# Supplementary material for: The association between having a coordinator and return to work: the rapid-return-to-work cohort study
Source: PubMed Central journal article supplement — BMJ Open. 2019 Feb 18;9(2):e024597. doi: 10.1136/bmjopen-2018-024597 (PMC6398742; doi:10.1136/bmjopen-2018-024597), 2019-02-18
Supplement: bmjopen-2018-024597.draft_revisions.pdf [file bmjopen-2018-024597.draft_revisions.pdf]

# BMJ Open

BMJ Open is committed to open peer review. As part of this commitment we make the peer review history of every article we publish publicly available.

When an article is published we post the peer reviewers' comments and the authors' responses online. We also post the versions of the paper that were used during peer review. These are the versions that the peer review comments apply to.

The versions of the paper that follow are the versions that were submitted during the peer review process. They are not the versions of record or the final published versions. They should not be cited or distributed as the published version of this manuscript.

BMJ Open is an open access journal and the full, final, typeset and author-corrected version of record of the manuscript is available on our site with no access controls, subscription charges or pay-per-view fees (<http://bmjopen.bmj.com>).

If you have any questions on BMJ Open's open peer review process please email [info.bmjopen@bmj.com](mailto:info.bmjopen@bmj.com)

# BMJ Open

## Does having a coordinator during occupational treatment and rehabilitation promote return to work? The rapid-RTW cohort study

|                               |                                                                                                                                                                                                                                                                                                                                                                                                                                                                                                                                    |
|-------------------------------|------------------------------------------------------------------------------------------------------------------------------------------------------------------------------------------------------------------------------------------------------------------------------------------------------------------------------------------------------------------------------------------------------------------------------------------------------------------------------------------------------------------------------------|
| Journal:                      | <i>BMJ Open</i>                                                                                                                                                                                                                                                                                                                                                                                                                                                                                                                    |
| Manuscript ID                 | bmjopen-2018-024597                                                                                                                                                                                                                                                                                                                                                                                                                                                                                                                |
| Article Type:                 | Research                                                                                                                                                                                                                                                                                                                                                                                                                                                                                                                           |
| Date Submitted by the Author: | 07-Jun-2018                                                                                                                                                                                                                                                                                                                                                                                                                                                                                                                        |
| Complete List of Authors:     | Skarpaas, Lisebet; Oslo Metropolitan University, Department of Occupational Therapy, Prosthetics and Orthotics; Presenter - Making Sense of Science<br>Haveraaen, Lise; Presenter - Making Sense of Science<br>Småstuen, Milada; Oslo Metropolitan University, Department of Nursing and Health Promotion<br>Shaw, William; University of Massachusetts Medical School, Division of Occupational & Environmental Medicine<br>Aas, Randi; Presenter - Making Sense of Science; University of Stavanger, Department of Public Health |
| Keywords:                     | Return to work, Occupational rehabilitation, Sick leave, Return to work coordination, Return to work programs                                                                                                                                                                                                                                                                                                                                                                                                                      |
|                               |                                                                                                                                                                                                                                                                                                                                                                                                                                                                                                                                    |

SCHOLARONE™  
Manuscripts

1  
2  
3 **Does having a coordinator during occupational treatment and rehabilitation promote**  
4  
5 **return to work? The rapid-RTW cohort study**  
6  
7  
8  
9

10 Lisebet Skeie Skarpaas<sup>1,2</sup>, Lise Aasen Haveraaen<sup>1</sup>, Milada Cvancarova Småstuen<sup>3</sup>, William S.  
11  
12 Shaw<sup>4</sup>, and Randi Wågø Aas<sup>1,2,5</sup>  
13  
14  
15

16  
17 <sup>1</sup>Presenter – Making Sense of Science, Stavanger, Norway  
18

19 <sup>2</sup>Department of Occupational Therapy, Prosthetics and Orthotics, Oslo Metropolitan University,  
20  
21 Oslo, Norway  
22

23 <sup>3</sup>Department of Nursing and Health Promotion, Oslo Metropolitan University, Oslo, Norway  
24  
25

26 <sup>4</sup>University of Massachusetts Medical School, Division of Occupational & Environmental  
27  
28 Medicine, Worcester, MA, USA  
29

30 <sup>5</sup>Department of Public Health, Faculty of Health Sciences, University of Stavanger, Stavanger,  
31  
32 Norway  
33  
34  
35

36  
37  
38 Corresponding author:

39  
40 Lisebet Skeie Skarpaas

41  
42 Faculty of Health Sciences, Oslo Metropolitan University

43  
44 Postbox 4 St. Olavs plass, N-0130 Oslo, Norway

45  
46 lisebet.skeie.skarpaas@oslomet.no

47  
48 +47 971 63 337  
49  
50  
51  
52

53  
54 Word count: 3807  
55  
56  
57  
58  
59  
60

1  
2  
3 **Does having a coordinator during occupational treatment and rehabilitation promote**  
4 **return to work? The rapid-RTW cohort study**  
5  
6  
7

8  
9 **ABSTRACT**  
10

11 **Objectives:** The aim of this study was to assess if the reported provision of a coordinator was  
12 associated with time to first- and first full- return to work (RTW) amongst sick-listed employees  
13 who participated in different Rapid-RTW programs in Norway.  
14  
15

16  
17  
18 **Design:** The study was designed as a cohort study.  
19

20  
21  
22 **Setting:** Rapid-RTW-programs (n=43) financed by the Regional Health Authority in hospitals  
23 (RHF) and Norwegian Labour and Welfare Administration (NAV) in Norway.  
24

25  
26 **Participants:** The sample included employees on full-time sick-leave who participated in Rapid-  
27 RTW-programs (n=326), who provided information about the coordination of the services they  
28 received. The median age was 46 years (min-max. 21-67), and 71% were female. The most  
29 common reported diagnoses were musculoskeletal- (57%) and mental health disorders (14%).  
30  
31

32  
33  
34 **Interventions:** The employees received different types of individually tailored RTW-programs  
35 all aimed at a rapid RTW; occupational rehabilitation (64%), treatment for medical or  
36 psychological issues, including assessment, and surgery (26%), and follow-up and work  
37 clarification services (10%). It was common to be provided with a coordinator (73%).  
38  
39

40  
41  
42 **Primary and secondary outcome measures:** Outcomes were measured as time to first-RTW  
43 (graded and 100%) and first full-RTW (100%).  
44

45  
46 **Results:** Employees provided with a coordinator returned to work later than employees who did  
47 not have a coordinator; a median (95% CI) of 128 (80-176) days versus 61 (43-79) days for first-  
48 RTW, respectively. This difference did not remain statistically significant in the adjusted  
49 regression analysis. For full-RTW, there was no statistically significant difference between  
50 employees provided with a coordinator versus those who was not.  
51  
52  
53  
54  
55  
56  
57  
58  
59  
60

1  
2  
3 **Conclusions:** The model of coordination provided in the Norwegian rapid-RTW-programs, did  
4 not contribute to a more rapid RTW for sick listed employees. Rethinking how return to work  
5 coordination should be organised could be wise in future program development.  
6  
7

8  
9  
10 **Keywords:** Return to work, occupational rehabilitation, sick leave, return to work coordination,  
11 return to work programs  
12  
13

## 14 **Article Summary**

### 15 **Strengths and limitations of this study**

- 16 - This study is strengthened by use of register data on sickness absence
- 17 - This study is strengthened by the number of included employees
- 18 - The study could be strengthened with smaller difference in n between employees  
19 with/without a coordinator  
20  
21  
22  
23  
24  
25  
26  
27  
28  
29  
30  
31  
32  
33  
34  
35  
36  
37  
38  
39  
40  
41  
42  
43  
44  
45  
46  
47  
48  
49  
50  
51  
52  
53  
54  
55  
56  
57  
58  
59  
60

## INTRODUCTION

Prolonged sick leave can lead to permanent work disability. Work disability gives health, social and economic consequences for the worker, employer, as well as for society<sup>1</sup>. Therefore, interventions facilitating a rapid return to work (RTW) are of importance, both at an individual and at a socioeconomic level<sup>1</sup>. The most common diagnostic groupings that cause sick leave in Norway are musculoskeletal disorders (MSD) and mental disorders, which constitute approximately 40% and 20% of the total number of lost sick leave days, respectively<sup>2</sup>. This is in line with other western countries<sup>1 3</sup>.

To prevent permanent work disability, there has been increasing focus on the role of coordination of RTW-processes and RTW-services. RTW-coordinators are well established as a part of RTW-programs in many western countries<sup>4</sup>. Insurers, employers, or governmental agencies often employ the coordinators<sup>5</sup>. In Norway, however, there are no formal guidelines or requirements for RTW-coordinators. Still, persons in need for long-lasting and coordinated services within health care and social services have a statutory right for an Individual plan, a management tool for holistic coordination, administered by a coordinator<sup>6 7</sup>. Furthermore, the government has implemented a coordination reform, seeking to offer service users more comprehensive and continuous services<sup>8</sup>. This reflects the government's expectation that RTW-programs cooperate and coordinate their services across stakeholders and arenas. In addition, several initiatives to promote rapid RTW have been implemented, both in the workplace arena and towards RTW-services<sup>9-11</sup>. Our recent study of The Rapid-RTW-program, the largest RTW-program in Norway, revealed that approximately two thirds of the employees in the program had a coordinator. However, these coordinators mainly coordinated services within their own programs, not

1  
2  
3 between the intervention arenas (i.e. workplace, social insurance, and health care), referred to as  
4 horizontal integration<sup>12 13</sup>. Furthermore, most of the employees with a coordinator received  
5 occupational rehabilitation services, and were sick-listed with MSD<sup>12</sup>.  
6  
7  
8  
9  
10

11  
12 Environmental interventions such as adjustments and accommodation at the workplace, have  
13 been found to be important for work reintegration amongst persons on sick leave due to MSD<sup>14-</sup>  
14  
15  
16  
17  
18  
19  
20  
21  
22  
23  
24  
25  
26  
27  
28  
29  
30  
31  
32  
33  
34  
35  
36  
37  
38  
39  
40  
41  
42  
43  
44  
45  
46  
47  
48  
49  
50  
51  
52  
53  
54  
55  
56  
57  
58  
59  
60  
16. Recent reviews have further documented the workplace as an important arena for RTW-  
programs directed at employees with mental health problems<sup>17 18</sup>. Inclusion of the workplace in  
RTW-programs requires cooperation between several stakeholders across different arenas and  
levels of the health and welfare system<sup>9 19 20</sup>. To enhance such cooperation, provision of RTW-  
coordinators has been tested in several countries, using various models for different groups of  
patients<sup>21-26</sup>.

Although the use of RTW-coordinators has received increasing attention, there is some debate  
about the effect of the coordinators for RTW. A recent review conducted by Vogel and  
colleagues (2017), concludes that there is no evidence that coordinated RTW-programs facilitate  
RTW compared to usual care<sup>27</sup>. The coordinated RTW-programs in the review were defined as  
those identifying barriers to RTW and providing a designated coordinator to overcome these  
barriers through multi-professional interventions, with several stakeholders involved and a face-  
to-face contact between employee and the coordinator<sup>27</sup>. However, the included programs were  
of various content, set-up and duration. Several of the studies included in the review were carried  
out in Norway<sup>28</sup>, Sweden<sup>29</sup> and Denmark<sup>23 30 31</sup>, indicating the review's<sup>27</sup> relevance for the  
Scandinavian welfare states. The programs described in the review are comparable to the Rapid-  
RTW-program in Norway in regard to their complexity and the aim to promote RTW<sup>12 27 32</sup>, but

1  
2  
3 might differ in their focus on barriers to RTW and stakeholder cooperation that are reported  
4  
5 lacking in the Rapid-RTW-programs<sup>12</sup>.  
6  
7  
8  
9

10 In contrast, several studies have found that RTW-coordination and provision of a RTW-  
11  
12 coordinator is positively association with time-to-RTW, and there is increasing evidence stating  
13  
14 that these components are important in occupational rehabilitation<sup>4 24 33-35</sup>. Furthermore, lack of  
15  
16 coordination is associated with prolonged RTW, and some studies have reported that lack of  
17  
18 coordination can complicate the RTW-process<sup>36</sup>. Reviews have documented RTW-coordination  
19  
20 as an important intervention predictor for RTW<sup>15 34 37-41</sup>, and interventions including stakeholders  
21  
22 at both rehabilitation program and the workplace have been found to be successful for RTW<sup>34 37</sup>  
23  
24  
25  
26  
27  
28  
29  
30  
31  
32  
33  
34  
35  
36  
37  
38  
39  
40  
41  
42  
43  
44  
45  
46  
47  
48  
49  
50  
51  
52  
53  
54  
55  
56  
57  
58  
59  
60

41 42. A recent review recommend implementation of RTW-programs towards sick listed  
employees consisting of multiple components, where service coordination was one of three in  
addition to health-focused and work modification components<sup>43</sup>.

In light of these contradictions, the aim of this study was to assess if the reported provision of a  
coordinator was associated with a more rapid time to first- and first full- return to work (RTW)  
amongst sick-listed employees who participated in different public and private Rapid-RTW  
programs in Norway.

## METHODS

### Design

The study was designed as a longitudinal cohort study of 326 employees on full-time sick leave,  
from 43 different Rapid-RTW programs in Norway.



## Setting

The present study is one of several studies in an evaluation of the national RTW-program in Norway, the Rapid-RTW-project. The Rapid RTW-program is a national program for patients on sick leave or at risk for sickness absence, aimed at reducing time to RTW and shorting the waiting-time for treatment. To this date, the program is the largest effort for promoting a fast and safe RTW in Norway<sup>10</sup>. The national program was implemented in 2007 and has an annual budget of NOK 700 million (approximately \$82 million). This initiative allowed for services to respond to tenders in order to get funding to develop and drift RTW-services, and prioritize patients in a work relation for assessment, treatment and rehabilitation. The funding of the national program will from 2018 be implemented in the health and welfare services' ordinary budgets<sup>44</sup>. The national program includes approximately 200 different public and private RTW-services, and is organised by the Regional Health Authorities (RHF) and the Norwegian Labour and Welfare Administration (NAV). The main types of programs are [1] occupational rehabilitation, both inpatient and outpatient, [2] assessment and follow-up services by the social security system (NAV), and [3] medical or psychological treatment, including assessment, and surgery<sup>10</sup>. The organization, content and intervention components, like the provision of a coordinator, were decided in each of the rapid-RTW-services.

## Data collection

All of the approximately 200 clinics or institutions offering Rapid-RTW services were invited to participate in the study. Services (n=46) that agreed to participate provided a local study coordinator, who recruited employees to the study in the period from February to December 2012. Both employees and their providers answered self-administered questionnaires about the

1  
2  
3 employees' health situation and the service they received, including the question "Did the  
4 program provide a person who tailored or coordinated your services?". They could choose to  
5 answer on paper, or digitally. Data on sickness absence was retrieved from the Norwegian Social  
6 Insurance Register. Data on type of services employees received were retrieved from the  
7 Norwegian Patient Registry. The register data was linked to the self-reported data using eleven-  
8 digit personal identification numbers. Each individual living in Norway is provided with a unique  
9 ID number that enables data from different registries to be linked.  
10  
11  
12  
13  
14  
15  
16  
17  
18  
19  
20

### 21 **Outcome measures**

22  
23 The outcome was defined as time to first-RTW and first full-RTW. Time was measured as days  
24 from when the employee started treatment at the RTW-program until the first day back at work,  
25 either partial or full job size (first-RTW), and until the employee for the first time returned to  
26 work in the same job size they had before (first- or full-RTW). These were therefore overlapping,  
27 and not mutually exclusive time frames. This way of measuring RTW is in line with previous  
28 research studies on time-to RTW<sup>45-47</sup>. The employees were followed for 360 days, and those who  
29 did not return within the follow-up time were censored in the analyses.  
30  
31  
32  
33  
34  
35  
36  
37  
38  
39  
40  
41

### 42 **Patient and public involvement**

43  
44 Patients were not involved in development of research question and outcome measure, nor  
45 design, recruitment or conduction of the study. The results will be made available through plain  
46 language synopsis and communicated to the public once published scientifically.  
47  
48  
49  
50  
51

### 52 **Participants**

53  
54 In total, 679 employees completed the questionnaire in the main cohort study. In the present  
55  
56  
57  
58  
59  
60

study, 326 sick-listed employees who [1] answered the question regarding having a coordinator or not, [2] replied yes/no to the question of provision of a coordinator, [3] were on full-time sick leave at start of the RTW-program were included in the analyses. Reasons for exclusion were accordingly: [1] employees who did not answer (n=185), [2] employees who answered “do not know” (n=120), and [3] employees who were on graded sick leave (n=168).

The samples' characteristics are presented in Table 1. The employees' median age was 46 years (min.-max. 21-67), and the majority had been sick-listed before (96%). The most common diagnoses were musculoskeletal disorders (MSD) (57%) and mental health problems (14%). The most common type of RTW-program provided was occupational rehabilitation (63%), which included rehabilitation in hospitals and institutions, both inpatient and outpatient. These types of services are explained in earlier publications<sup>10 12</sup>. Of the included participants, 73% were provided with a coordinator.

Table 1: Participants

| Variable           | Category                          | n   | %  |
|--------------------|-----------------------------------|-----|----|
| Gender             | Female                            | 232 | 71 |
|                    | Male                              | 94  | 29 |
| Age                | Up to 30 years                    | 27  | 8  |
|                    | 31 - 49 years                     | 175 | 54 |
|                    | 50 years +                        | 123 | 38 |
| Marital Status*    | Living with partner               | 219 | 68 |
|                    | Not living with partner           | 105 | 32 |
| Educational Level* | Elementary school (up to 9 years) | 38  | 12 |
|                    | Upper secondary school (12 years) | 154 | 48 |
|                    | University degree (up to 4 years) | 93  | 29 |
|                    | University degree (> 4 years)     | 35  | 11 |
| Diagnosis          | Musculoskeletal                   | 185 | 57 |
|                    | Psychiatric                       | 45  | 14 |
|                    | Others incl. cardiovascular       | 35  | 11 |

|                             |                                                                       |     |    |
|-----------------------------|-----------------------------------------------------------------------|-----|----|
|                             | Cancer                                                                | 32  | 10 |
|                             | No diagnosis                                                          | 16  | 5  |
|                             | Unspecific                                                            | 13  | 4  |
| Symptoms*                   | Pain at rest (yes)                                                    | 267 | 85 |
|                             | Pain in activity (yes)                                                | 277 | 89 |
|                             | Depressive mood (yes)                                                 | 244 | 78 |
|                             | Anxiety (yes)                                                         | 191 | 60 |
| Type of RTW-program*        | Occupational rehabilitation                                           | 206 | 64 |
|                             | Medical or psychological treatment, including assessment, and surgery | 73  | 26 |
|                             | Follow-up and Work clarification services                             | 32  | 10 |
| Provided with a coordinator | Yes                                                                   | 237 | 73 |
| Sector*                     | Public                                                                | 148 | 48 |
|                             | Private                                                               | 158 | 52 |
| History of sickness absence | Yes                                                                   | 314 | 96 |

Note: data on all participants except \*Missing; marital status n=2, educational level n=6, symptoms (pain at rest n=10, pain in activity n=15, depressive mood n=11, anxiety n=10), type of RTW-program n=4, sector n=20.

## Statistical analyses

Diagnoses were registered as ICPC or ICD codes by the physician in the medical records, and categorised into the largest diagnostic groups “MSD”, “psychiatric disorders”, “cancer” and “common/unspecific disorders”, other diagnosis (including neurological and heart disorders), or missing/no diagnosis, for the descriptive analysis. For the regression analysis, the categories common/unspecific, other diagnoses and missing/no diagnosis were collapsed. Time to first-RTW and full-RTW were calculated using the Kaplan-Meier method, and crude differences between those who had and did not have a coordinator were assessed with log-rank tests.

Stepwise Cox regression models were used to calculate the probability for returning to work (first-RTW and first full-RTW) for employees with a coordinator versus those who had not.

Potential confounders for RTW were entered into the models. The confounders were identified in earlier studies in the literature<sup>45 48-50</sup>, and included variables such as age, gender, educational level, marital status, diagnosis, self-reported symptoms (pain at rest, pain in activity, depressive

mood, and anxiety), sick leave history, household income, and type of service. The results were expressed as hazard ratios (HR) with 95 % Confidence Intervals (CI). P-values of  $<0.05$  were considered statistically significant and all tests were two-sided. The analyses were conducted in IBM SPSS Statistics 24.

## RESULTS

### Unadjusted results

Having a coordinator was associated with delayed time to first-RTW (Figure 1). In the unadjusted analyses, employees who had a coordinator experienced a first-RTW after 128 days (median; 95% CI: 80-176) compared to 61 days (95% CI: 43-79) for those who did not. This difference was statistically significant.

*Insert Figure 1*

The unadjusted results for first full-RTW showed that patients who had a coordinator returned to work a median of 57 days later than employees who did not have a coordinator; a median of 185 days (95% CI 137-233) versus 128 days (95% CI 72-184), respectively (Figure 2). However, this difference did not reach the level of statistical significance ( $p=0.24$ ).

*Insert Figure 2*

### Adjusted results

In the adjusted analysis, we controlled for age, gender, educational level, marital status,

diagnosis, sick leave history, symptoms, household income, and type of program. Neither time to first-RTW nor first full-RTW was statistical significant in the adjusted analysis, with a hazard ratio of 0.75 (95% CI 0.51-1.10) for first-RTW, and 0.82 (95% CI 0.55-1.22) for first full-RTW (Table 2).

Table 2: The probability of experiencing a first- and full RTW

|                                     | Unadjusted |           |         | Adjusted* |           |         |
|-------------------------------------|------------|-----------|---------|-----------|-----------|---------|
|                                     | HR         | 95 % CI   | p-value | HR        | 95 % CI   | p-value |
| First-RTW<br>Having a coordinator** | 0.70       | 0.53-0.94 | 0.02    | 0.75      | 0.51-1.10 | 0.14    |
| Full-RTW<br>Having a coordinator**  | 0.83       | 0.62-1.13 | 0.24    | 0.82      | 0.55-1.22 | 0.32    |

Notes: \*adjusted for age, gender, marital status, educational level, household income, diagnosis, type of RTW-program, symptoms (pain at rest, pain in activity, depressive mood, and anxiety), and history of sickness absence, \*\* ref not having a coordinator

Only type of RTW-program was a confounding factor between having a coordinator and RTW. In a stepwise adjusted analysis, time to first-RTW remained statistically significant associated with having a coordinator when the other control variables were added to the model except type of program (HR 0.72 CI 0.52-0.99). In order to understand differences between coordinator and type of program in the model, time to first-RTW for the different program types was assessed. The difference in time to first-RTW was statistical significant when comparing the program types; Occupational rehabilitation had a median of 109 days before RTW (95% CI 52-166) and differed from Assessment and follow-up programs through NAV which had a median of 238 days (95% CI 192-284). Medical or psychological treatment, including assessment, and surgery had a median of 55 days (95% CI 37-73) and also differed from Assessment and follow-up programs through NAV.

## DISCUSSIONS

This study assessed whether provision of a coordinator was associated with time to first-RTW and first full-RTW in a cohort of sick-listed employees who participated in the Rapid-RTW program in Norway. The results show that having a coordinator did not enhance a more rapid RTW. Even though participants provided with a coordinator had a delayed first return to work compared to those who did not have a coordinator, the adjusted analyses revealed that the type of program the sick listed employee received might be the mediating factor for this delay. These two findings are discussed below.

First, the present study revealed that provision of a coordinator did not contribute to a more rapid RTW for sick listed employees who participated in the Rapid-RTW program in Norway. This result was somewhat unexpected. Even though there is some debate on the effect of coordination, having a coordinator has been found to increase the probability of returning to work in several previous studies<sup>24 34 35 51</sup>. The results may have several explanations. One explanation might be that the coordinators in the present study were provided by the health care services<sup>12</sup>, and they mostly coordinated their own services. In international studies, however, the coordinator is often provided by the insurers, employers or governmental agencies<sup>5</sup>, making the coordinator more directly linked to the workplace. The workplace is one of the most important arenas for RTW-programs<sup>15 16</sup>, since early contact with the workplace, as well as adaptations and support at the workplace, all are predictors for RTW<sup>15 34 39-42</sup>. As such, the coordinators in the present study might differ from the RTW-coordinators in international studies, both in regard to who provides them and which of the intervention arenas they coordinate. A recent study from Norway found that adding a workplace focus in a multidisciplinary RTW-program in the specialist health care

1  
2  
3 did not enhance RTW rates<sup>28</sup>. The coordination provided in the study resulted in a weak  
4  
5 connection between the RTW-program and the workplace<sup>28</sup>. Hence, it might be possible that the  
6  
7 model of coordination where the coordinator is placed in the specialist health care service,  
8  
9 without real possibilities to coordinate and accommodate *at* the workplace, does not facilitate  
10  
11 RTW.  
12  
13  
14  
15  
16

17 Secondly, although an association between having a coordinator and delayed RTW was found in  
18  
19 the univariate analysis, the delayed first-RTW did not reach statistical significance when  
20  
21 controlling for type of program. This suggests type of program as a mediating factor for the delay  
22  
23 in RTW, and that the program type explains more of the variation in RTW than being provided  
24  
25 with a coordinator. Alternatively, the underlying cause for being referred to a specific type of  
26  
27 RTW-program may explain even more of the variation found in this study. The distribution of  
28  
29 coordinators varies across the different types of RTW-programs, and is most likely provided in  
30  
31 assessment or follow-up services through NAV and occupational rehabilitation<sup>12</sup>. Furthermore,  
32  
33 treatment programs are often provided to employees with specific MSD or mental disorders,  
34  
35 whereas employees referred to occupational rehabilitation services often have more complex  
36  
37 problems or situations<sup>10</sup>. This study shows, regardless of whether the employees are provided  
38  
39 with a coordinator, that the time to RTW doubles for employees receiving occupational  
40  
41 rehabilitation compared to those receiving treatment, and furthermore quadruples for those  
42  
43 receiving assessment and follow-up services through NAV. Therefore, one explanation for the  
44  
45 delayed RTW for those provided with a coordinator may be that it is an expression of the  
46  
47 complexity of the employees' situation. A more complex situation for the sick listed employee, in  
48  
49 terms of for example co-morbid diagnoses<sup>52 53</sup>, or difficulties in regard to psychosocial factors at  
50  
51 work<sup>45 48</sup> may work as barriers for RTW. Severity of health problems may as well complicate the  
52  
53  
54  
55  
56  
57  
58  
59  
60



1  
2  
3 RTW process, as shown in previous studies<sup>37 38</sup>. Pain may indicate higher experienced severity,  
4  
5 however, even though pain at rest is associated with provision of a coordinator in rapid-RTW-  
6  
7 programs<sup>12</sup>, pain is neither revealed as a predictor for provision of a coordinator<sup>12</sup>, nor a  
8  
9 significant explanatory factor for first- or full-RTW in this study. Another possible explanation is  
10  
11 connected to the complexity of the RTW-programs<sup>19</sup>. Some of the services include several  
12  
13 interventions and components<sup>10</sup>, and it is possible that the provision of a coordinator only adds to  
14  
15 an already full schedule of interventions. For some groups, “brief interventions” has been found  
16  
17 to be just as effective as multidisciplinary rehabilitation services with several intervention  
18  
19 components<sup>30 54-56</sup>. Otherwise, if the services does not make room for enhancing contact with  
20  
21 workplace and other stakeholders<sup>12</sup> the evidence based active elements of coordination may be  
22  
23 absent, leading to delayed RTW or no effect.  
24  
25  
26  
27  
28  
29

30  
31 Nevertheless, the findings in this study are in line with a recent systematic review<sup>27</sup>, as well as  
32  
33 other studies on coordination from Scandinavia<sup>28 30</sup>, supporting the finding that coordination  
34  
35 might not facilitate RTW. Could this be due to the coordinator model used in the Scandinavian  
36  
37 welfare system? This seems at least to have something to do with the type of coordination, where  
38  
39 integration of services across levels and arenas are lacking<sup>12</sup>. Furthermore, it might be that the  
40  
41 groups receiving coordination is not well targeted. Still, we need to know more about who might  
42  
43 benefit from having a coordinator. Coordination of RTW-processes for employees with mental  
44  
45 health problems has for example been studied to a small extent<sup>27</sup>, and we do not know how  
46  
47 coordination affects this group of sick-listed employees. Furthermore, there is a need to  
48  
49 investigate and develop the roles, tasks and competencies of the RTW-coordinator, within a  
50  
51 Norwegian context. The Norwegian model for coordination, where the link between the  
52  
53 coordinator and the workplace is diffuse and not formalized in the RTW-programs<sup>10 12 57 58</sup>,

1  
2  
3 should be further examined. Implications for practice and research, both in Norway and  
4  
5 internationally, will be to develop new coordination models and implement such models in line  
6  
7 with evidence, where a closer workplace connection seems to be a way forward<sup>27 28</sup>.  
8  
9

10  
11  
12 One of the strengths of this study is the high number of participants and the use of register data,  
13  
14 which are both detailed and precise regarding sickness absence and diagnoses, as it is connected  
15  
16 to the public social security benefit system. Approx. two-thirds of the patients in the study were  
17  
18 provided with a coordinator, limiting the power to estimate the effect of not having a coordinator.  
19  
20 Although the variable of provision of a coordinator is based on self-report from employees in  
21  
22 present study, the time-to first-RTW results from the analyses has been verified (median 102 days  
23  
24 versus 79 days for those provided with coordinator versus not, respectively, with p-value 0.25)  
25  
26 when compared with providers' responses to the same variable ("Did your service provide a  
27  
28 coordinator for this patient?"). Furthermore, there was an association between having a  
29  
30 coordinator and type of RTW-program. This make it difficult to generalize the findings to all sick  
31  
32 listed employees participating in the Rapid-RTW-programs as we were not able to distinguish  
33  
34 between the effect of having a coordinator and a given program. Additionally, the proportion of  
35  
36 employees sick-listed due to MSD are higher than in the national statistics of Norway. However,  
37  
38 since employees with MSD are the best-documented group of sick-listed benefiting from RTW-  
39  
40 coordination, this should be more an advantage regarding possibilities of revealing a difference  
41  
42 between those provided with and those not provided with a coordinator. There is a possibility of  
43  
44 selection bias in the study as the percentage of employees sick listed with psychiatric issues and  
45  
46 receiving psychological treatment is higher among the non-respondents. Fewer of employees  
47  
48 with psychiatric issues is provided with a coordinator<sup>12</sup>, meaning the power of analysis of this  
49  
50 diagnose group might have been enhanced if more of these employees responded. However,  
51  
52  
53  
54  
55  
56  
57  
58  
59  
60

1  
2  
3 employees with this diagnosis represent a small proportion of the total number of included  
4  
5 participants. Therefore, inclusion of those employees would most likely not affect the main  
6  
7 results decisively. Analysis of the full material of employees on full-time sick leave (n=546)  
8  
9 shows some statistically significant differences between respondents and non-respondents on the  
10  
11 question of provision of a coordinator. Non-respondents' median age was slightly lower (44  
12  
13 years), and more had mental diagnosis (20%). In addition, fewer received occupational  
14  
15 rehabilitation of the non-respondents (43%). If these were included, the proportion of employees  
16  
17 with mental health disorders receiving treatment would most likely be larger, and this would most  
18  
19 likely strengthen the present results.  
20  
21  
22  
23  
24  
25

## 26 **CONCLUSION**

27  
28  
29 This study revealed that employees participating in RTW-programs and who were provided with  
30  
31 a coordinator had delayed time until they returned to work, compared to those who did not have a  
32  
33 coordinator. However, type of program seems to be a mediating factor in this study, that explains  
34  
35 more of the variation in RTW than being provided with a coordinator and this should be further  
36  
37 investigated. The model of coordination provided in the Norwegian rapid-RTW-programs,  
38  
39 mainly as part of occupational rehabilitation programs in the health care, seems to not add to a  
40  
41 more rapid RTW. Hence, RTW-coordination where all three intervention arenas; the workplace,  
42  
43 social services, and health care are targeted should be further developed, tested and studied.  
44  
45  
46  
47  
48  
49

## 50 **Ethical statement**

51  
52 The Norwegian Centre for Research Data (NSD) approved this study with the reference number:  
53  
54 28988. Furthermore, the Norwegian Data Protection Authority gave consent to handle person-  
55  
56  
57  
58  
59  
60

1  
2  
3 identified information, reference number: 13/00141-5/KEL. Participants in the study gave  
4  
5 informed consent.  
6  
7  
8  
9

## 10 **Funding**

11  
12 This work was supported by the Norwegian Ministry of Labour, Oslo Metropolitan University,  
13  
14 and Presenter – Making Sense of Science.  
15  
16  
17  
18

## 19 **Acknowledgements**

20  
21 We would like to thank the participants, and the 43 rapid-RTW-services for their valued  
22  
23 contribution to this study. Especially thanks to the study coordinator in each of the RTW-  
24  
25 services. We would further like to thank the Ministry of Labour and Social Affairs for co-funding  
26  
27 the data collection of this study.  
28  
29  
30  
31  
32

## 33 **Author Contributions**

34  
35 LSS has been involved in data collection, performed the analysis of the material, and has been the  
36  
37 main author of all parts of the drafted article.  
38  
39

40 LAH has been involved in data collection, contributed to the discussion, and has commented on  
41  
42 the drafts.  
43  
44

45 MCS has commented on the drafts.  
46  
47

48 WSS has commented on the drafts.  
49  
50

51 RWA is the principal investigator and project manager of the Rapid-RTW project. She designed  
52  
53 the cohort study, and managed and took part in all phases of this project. She planned the  
54  
55 statistical analysis, and commented on the drafts.  
56  
57  
58  
59  
60

## Declarations

The authors declare no conflicts of interests.

## Consent for publication

Not applicable.

## Availability of data and material

The datasets analysed during the current study are not publicly available due to research ethical considerations, but are available from the corresponding author on reasonable request.

## REFERENCES

1. OECD. *Sickness, disability and work: breaking the barriers: a synthesis of findings across OECD countries*. Paris: OECD, 2010.
2. NAV. *Utviklingen i sykefraværet, 3 . kvartal 2017*. In: Sundell T, ed.: *Arbeids- og velferdsdirektoratet*, 2017.
3. OECD. *Sick on the job? Myths and Realities about Mental Health and Work*. Mental Health and Work: OECD, 2012.
4. Shaw W, Hong QN, Pransky G, et al. A literature review describing the role of return-to-work coordinators in trial programs and interventions designed to prevent workplace disability. *Journal of Occupational Rehabilitation* 2008;18(1):2-15.
5. Pransky G, Shaw WS, Loisel P, et al. Development and validation of competencies for return to work coordinators. *Journal of Occupational Rehabilitation* 2010;20(1):41-48. doi: 10.1007/s10926-009-9208-x
6. Sosial- og h. *Individuell plan 2005 : veileder til forskrift om individuell plan*. Oslo: Sosial- og helsedirektoratet, 2005.
7. Hagen R, Johnsen E. *Styring Gjennom Samhandling: Samhandlingsreformen som Kasus*. In: Melby L, Tjora AH, eds. *Samhandling for helse*. Oslo: Gyldendal akademisk 2013.
8. Norway HaWA. *Samhandlingsreformen : rett behandling - på rett sted - til rett tid*. Oslo: Helse- og omsorgsdepartementet 2009.
9. Aas RW. *Workplace-based sick leave prevention and return to work. Exploratory studies [Ph.D. Thesis]*. Karolinska Institutet, 2011.
10. Aas R, Solberg A, Strupstad J. *Raskere tilbake. Organisering, kompetanse, mottakere og forløp i 120 tilbud til sykmeldte*: IRIS, 2011.
11. Lindoe P, Bakke Å, Aas RW. *Avtalen for et inkluderende arbeidsliv. Virkemidler fra nasjonalt nivå til ledernivå i oppfølgingen av sykemeldte*. *Tidsskrift for Arbejdsliv* 2006;8(2):68-89.

12. Skarpaas LS, Haveraaen LA, Småstuen MC, et al. Vertical or horizontal Return to Work Coordination? The Rapid-RTW Cohort study. *Submitted* 2018
13. Hvinden B. Divided against itself : a study of integration in welfare bureaucracy. Oslo: Scandinavian University Press 1994.
14. van Oostrom SH, van Mechelen W, Terluin B, et al. A participatory workplace intervention for employees with distress and lost time: a feasibility evaluation within a randomized controlled trial. *Journal of Occupational Rehabilitation* 2009;19(2):212-22. doi: 10.1007/s10926-009-9170-7
15. van Vilsteren M, van Oostrom SH, de Vet HC, et al. Workplace interventions to prevent work disability in workers on sick leave. *Cochrane Database Syst Rev* 2015;10:CD006955. doi: 10.1002/14651858.CD006955.pub3 [published Online First: 2015/10/06]
16. Nastasia I, Coutu M-F, Tcaciuc R. Topics and trends in research on non-clinical interventions aimed at preventing prolonged work disability in workers compensated for work-related musculoskeletal disorders (WRMSDs): a systematic, comprehensive literature review. *Disability And Rehabilitation* 2014;36(22):1841-56. doi: 10.3109/09638288.2014.882418
17. Nieuwenhuijsen K, Faber B, Verbeek JH, et al. Interventions to improve return to work in depressed people. *Cochrane Database of Systematic Reviews*;12:CD006237.
18. Pomaki G, Franche R-L, Murray E, et al. Workplace-Based Work Disability Prevention Interventions for Workers with Common Mental Health Conditions: A Review of the Literature. *Journal of Occupational Rehabilitation* 2012;22(2):182-95. doi: 10.1007/s10926-011-9338-9
19. Loisel P, Durand MJ, Berthelette D, et al. Disability Prevention: New Paradigm for the Management of Occupational Back Pain. *Disease Management & Health Outcomes* 2001;9(7):351-60.
20. Steenstra I, Cullen K, Irvin E, et al. A systematic review of interventions to promote work participation in older workers. *Journal of Safety Research* 2016:No Pagination Specified. doi: <http://dx.doi.org/10.1016/j.jsr.2016.12.004>
21. Anema JR, Steenstra IA, Bongers PM, et al. Multidisciplinary rehabilitation for subacute low back pain: Graded activity or workplace intervention or both? A randomized controlled trial. *Spine* 2007;32(3):291-98. doi: <http://dx.doi.org/10.1097/01.brs.0000253604.90039.ad>
22. Lander F, Friche C, Tornemand H, et al. Can we enhance the ability to return to work among workers with stress-related disorders? *BMC Public Health* 2009;9:372. doi: <https://dx.doi.org/10.1186/1471-2458-9-372>
23. Bültmann U, Sherson D, Olsen J, et al. Coordinated and tailored work rehabilitation: a randomized controlled trial with economic evaluation undertaken with workers on sick leave due to musculoskeletal disorders. *Journal of Occupational Rehabilitation* 2009;19(1):81-93. doi: 10.1007/s10926-009-9162-7
24. Varatharajan S, Cote P, Shearer HM, et al. Are work disability prevention interventions effective for the management of neck pain or upper extremity disorders? A systematic review by the Ontario Protocol for Traffic Injury Management (OPTIMa) collaboration. *Journal of Occupational Rehabilitation* 2014;24(4):692-708. doi: <https://dx.doi.org/10.1007/s10926-014-9501-1>
25. Hubbard G, Gray NM, Ayansina D, et al. Case management vocational rehabilitation for women with breast cancer after surgery: A feasibility study incorporating a pilot randomised controlled trial. *Trials* 2013;14 (1) (no pagination)(175) doi: <http://dx.doi.org/10.1186/1745-6215-14-175>

- 1  
2  
3 26. Poulsen OM, Aust B, Bjoerner JB, et al. Effect of the Danish return-to-work program on long-  
4 term sickness absence: results from a randomized controlled trial in three municipalities.  
5 *Scandinavian Journal Of Work, Environment & Health* 2014;40(1):47-56. doi:  
6 10.5271/sjweh.3383  
7  
8 27. Vogel N, Schandelmaier S, Zumbrunn T, et al. Return-to-work coordination programmes for  
9 improving return to work in workers on sick leave. *Cochrane Database Syst Rev*  
10 2017;3(3):CD011618. doi: 10.1002/14651858.CD011618.pub2  
11  
12 28. Myhre K, Marchand GH, Leivseth G, et al. The effect of work-focused rehabilitation among  
13 patients with neck and back pain: a randomized controlled trial. *Spine* 2014;39(24):1999-  
14 2006. doi: <https://dx.doi.org/10.1097/BRS.0000000000000610>  
15  
16 29. Lindh M, Lurie M, Sanne H. A randomized prospective study of vocational outcome in  
17 rehabilitation of patients with non-specific musculoskeletal pain: a multidisciplinary  
18 approach to patients identified after 90 days of sick-leave. *Scand J Rehabil Med*  
19 1997;29(2):103-12.  
20  
21 30. Jensen C, Jensen OK, Christiansen DH, et al. One-year follow-up in employees sick-listed  
22 because of low back pain: randomized clinical trial comparing multidisciplinary and brief  
23 intervention. *Spine* 2011;36(15):1180-89.  
24  
25 31. Stapelfeldt CM, Christiansen DH, Jensen OK, et al. Subgroup analyses on return to work in  
26 sick-listed employees with low back pain in a randomised trial comparing brief and  
27 multidisciplinary intervention. *BMC Musculoskeletal Disorders* 2011;12:112-12.  
28  
29 32. Craig P, Dieppe P, Macintyre S, et al. Developing and evaluating complex interventions: the  
30 new Medical Research Council guidance. *BMJ (Clinical Research Ed)* 2008;337:a1655-  
31 a55. doi: 10.1136/bmj.a1655  
32  
33 33. MacEachen E, Clarke J, Franche R-L, et al. Systematic review of the qualitative literature on  
34 return to work after injury. *Scandinavian Journal Of Work, Environment & Health*  
35 2006;32(4):257-69.  
36  
37 34. Franche R, Cullen K, Clarke J, et al. Workplace-based return-to-work interventions: a  
38 systematic review of the quantitative literature. *Journal of Occupational Rehabilitation*  
39 2005;15(4):607-31.  
40  
41 35. Nevala N, Pehkonen I, Koskela I, et al. Workplace accommodation among persons with  
42 disabilities: A systematic review of its effectiveness and barriers or facilitators. *J Occup*  
43 *Rehabil* 2015;25(2):432-48. doi: <http://dx.doi.org/10.1007/s10926-014-9548-z>  
44  
45 36. Young AE, Wasiak R, Roessler RT, et al. Return-to-work outcomes following work  
46 disability: stakeholder motivations, interests and concerns. *Journal of Occupational*  
47 *Rehabilitation* 2005;15(4):543-56.  
48  
49 37. Cancelliere C, Donovan J, Stochkendahl MJ, et al. Factors affecting return to work after  
50 injury or illness: best evidence synthesis of systematic reviews. *Chiropractic & manual*  
51 *therapies* 2016;24(1):32. doi: 10.1186/s12998-016-0113-z [published Online First:  
52 2016/09/10]  
53  
54 38. Rinaldo U, Selander J. Return to work after vocational rehabilitation for sick-listed workers  
55 with long-term back, neck and shoulder problems: A follow-up study of factors involved.  
56 *Work* 2016;55(1):115-31. doi: <https://dx.doi.org/10.3233/WOR-162387>  
57  
58 39. Williams-Whitt K, Bultmann U, Amick B, 3rd, et al. Workplace Interventions to Prevent  
59 Disability from Both the Scientific and Practice Perspectives: A Comparison of Scientific  
60 Literature, Grey Literature and Stakeholder Observations. *Journal of Occupational*  
*Rehabilitation* 2016;26(4):417-33. doi: <https://dx.doi.org/10.1007/s10926-016-9664-z>

- 1  
2  
3 40. Briand C, Durand M, St-Arnaud L, et al. How well do return-to-work interventions for  
4 musculoskeletal conditions address the multicausality of work disability? *Journal of*  
5 *Occupational Rehabilitation* 2008;18(2):207-17.  
6  
7 41. Franche R, Baril R, Shaw W, et al. Workplace-based return-to-work interventions: optimizing  
8 the role of stakeholders in implementation and research. *Journal of Occupational*  
9 *Rehabilitation* 2005;15(4):525-42.  
10  
11 42. Hoefsmit N, Houkes I, Nijhuis F. Intervention Characteristics that Facilitate Return to Work  
12 After Sickness Absence: A Systematic Literature Review. *Journal of Occupational*  
13 *Rehabilitation* 2012;22(4):462-77. doi: 10.1007/s10926-012-9359-z  
14  
15 43. Cullen KL, Irvin E, Collie A, et al. Effectiveness of Workplace Interventions in Return-to-  
16 Work for Musculoskeletal, Pain-Related and Mental Health Conditions: An Update of the  
17 Evidence and Messages for Practitioners. *Journal of Occupational Rehabilitation*  
18 2018;28(1):1-15. doi: 10.1007/s10926-016-9690-x  
19  
20 44. Regjeringen. Prop. 1 S (2017–2018). In: omsorgsdepartementet H-o, ed. [www.regjeringen.no](http://www.regjeringen.no):  
21 Regjeringen, 2017.  
22  
23 45. Haverlaen LA, Skarpaas LS, Aas RW. Job demands and decision control predicted return to  
24 work: the rapid-RTW cohort study. *BMC Public Health* 2017;17:154. doi:  
25 10.1186/s12889-016-3942-8  
26  
27 46. Flach PA, Groothoff JW, Krol B, et al. Factors associated with first return to work and sick  
28 leave durations in workers with common mental disorders. *European journal of public*  
29 *health* 2012;22(3):440-5. doi: 10.1093/eurpub/ckr102 [published Online First:  
30 2011/08/16]  
31  
32 47. Nieuwenhuijsen K, Verbeek J, Siemerink J, et al. Quality of rehabilitation among workers  
33 with adjustment disorders according to practice guidelines; a retrospective cohort study.  
34 *Occupational and Environmental Medicine* 2003;60(Suppl 1):i21-i25. doi:  
35 10.1136/oem.60.suppl\_1.i21  
36  
37 48. Haverlaen L, Berg JE, Skarpaas LS, et al. Do psychosocial job demands, decision control and  
38 social support predict return to work after occupational rehabilitation or medical  
39 treatment? The rapid-RTW study. *Work : A Journal of Prevention, Assessment and*  
40 *rehabilitation* 2016  
41  
42 49. Selander J, Marnetoft SU, Bergroth A, et al. Return to work following vocational  
43 rehabilitation for neck, back and shoulder problems: risk factors reviewed. *Disabil*  
44 *Rehabil* 2002;24(14):704-12. doi: 10.1080/09638280210124284 [published Online First:  
45 2002/10/25]  
46  
47 50. Cornelius L, Klink J, Groothoff J, et al. Prognostic Factors of Long Term Disability Due to  
48 Mental Disorders: A Systematic Review. *Journal of Occupational Rehabilitation*  
49 2011;21(2):259-74. doi: 10.1007/s10926-010-9261-5  
50  
51 51. Schandelmaier S, Ebrahim S, Burkhardt SCA, et al. Return to work coordination programmes  
52 for work disability: a meta-analysis of randomised controlled trials. *PLoS ONE*  
53 2012;7(11):e49760-e60. doi: 10.1371/journal.pone.0049760  
54  
55 52. Huijs J, Koppes L, Taris T, et al. Differences in Predictors of Return to Work Among Long-  
56 Term Sick-Listed Employees with Different Self-Reported Reasons for Sick Leave.  
57 *Journal of Occupational Rehabilitation* 2012;22(3):301-11. doi: 10.1007/s10926-011-  
58 9351-z  
59  
60 53. Laisné F, Lecomte C, Corbière M. Biopsychosocial predictors of prognosis in  
musculoskeletal disorders: a systematic review of the literature (corrected and  
republished) \*. *Disability And Rehabilitation* 2012;34(22):1912-41.



- 1  
2  
3 54. Aas RW, Skarpaas LS. The impact of a brief vs. multidisciplinary intervention on return to  
4 work remains unclear for employees sick-listed with low back pain. *Australian*  
5 *Occupational Therapy Journal* 2012;59(3):249-50. doi: 10.1111/j.1440-  
6 1630.2012.01020.x  
7  
8 55. Brox JI, Storheim K, Grotle M, et al. Systematic review of back schools, brief education, and  
9 fear-avoidance training for chronic low back pain. *The Spine Journal: Official Journal Of*  
10 *The North American Spine Society* 2008;8(6):948-58.  
11 56. Guzman J, Hayden J, Furlan AD, et al. Key Factors in Back Disability Prevention: A  
12 Consensus Panel on Their Impact and Modifiability. *Spine* 2007;32(7):807-15.  
13 57. Skarpaas L, Berg J, Ramvi E, et al. Eksperters synspunkter på tilbudet til sykmeldte i Norge.  
14 Første runde av en delphi-studie. *Ergoterapeuten* 2017;60(1):78-89.  
15 58. Skarpaas LS, Ramvi E, Løvereide L, et al. Maximizing work integration in job placement of  
16 individuals facing mental health problems: Supervisor experiences. *Work* 2016;53(1):87-  
17 98 12p. doi: 10.3233/WOR-152218  
18  
19  
20  
21  
22  
23

24 **Figure 1:** Kaplan-Meier survival plot of time until first-RTW (days)

25  
26 **Figure 2:** Kaplan-Meier survival plot of time until first full-RTW (days)  
27  
28  
29  
30  
31  
32  
33  
34  
35  
36  
37  
38  
39  
40  
41  
42  
43  
44  
45  
46  
47  
48  
49  
50  
51  
52  
53  
54  
55  
56  
57  
58  
59  
60

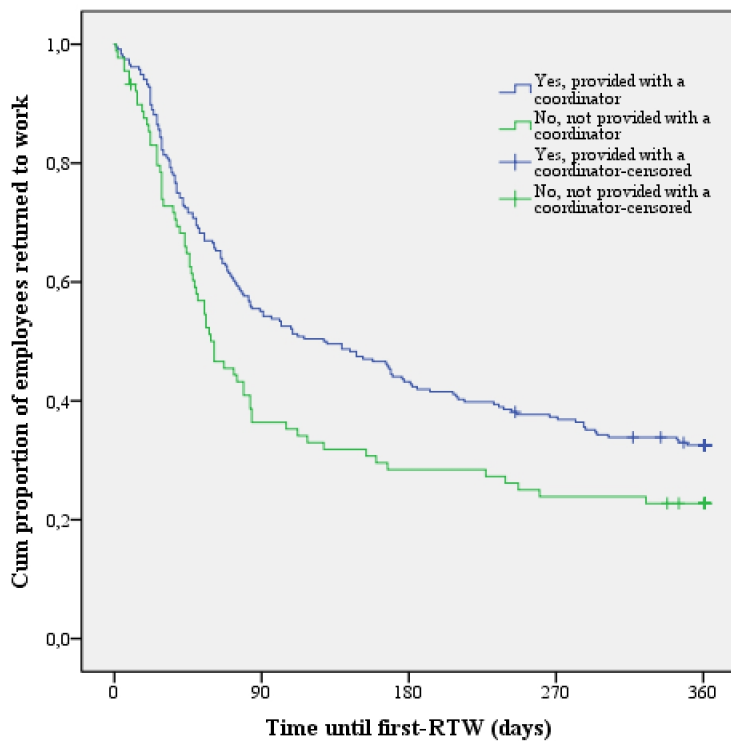

Figure 1: Kaplan-Meier survival plot of time until first-RTW (days)

105x84mm (300 x 300 DPI)

1  
2  
3  
4  
5  
6  
7  
8  
9  
10  
11  
12  
13  
14  
15  
16  
17  
18  
19  
20  
21  
22  
23  
24  
25  
26  
27  
28  
29  
30  
31  
32  
33  
34  
35  
36  
37  
38  
39  
40  
41  
42  
43  
44  
45  
46  
47  
48  
49  
50  
51  
52  
53  
54  
55  
56  
57  
58  
59  
60

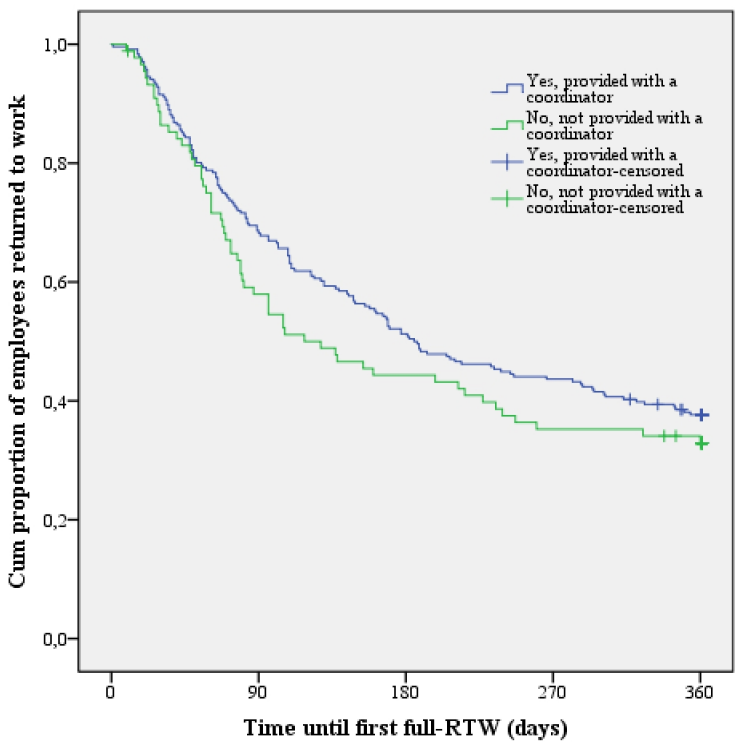

Figure 2: Kaplan-Meier survival plot of time until first full-RTW (days)

105x84mm (300 x 300 DPI)

## STROBE Statement—checklist of items that should be included in reports of observational studies

|                              | Item No | Recommendation                                                                                                                                                                                                                                                                                                                                                                                                                                                                                                                                                                                         |
|------------------------------|---------|--------------------------------------------------------------------------------------------------------------------------------------------------------------------------------------------------------------------------------------------------------------------------------------------------------------------------------------------------------------------------------------------------------------------------------------------------------------------------------------------------------------------------------------------------------------------------------------------------------|
| <b>Title and abstract</b>    | 1       | (a) Indicate the study's design with a commonly used term in the title or the abstract<br><i>Page 1</i>                                                                                                                                                                                                                                                                                                                                                                                                                                                                                                |
|                              |         | (b) Provide in the abstract an informative and balanced summary of what was done and what was found<br><i>Page 2</i>                                                                                                                                                                                                                                                                                                                                                                                                                                                                                   |
| <b>Introduction</b>          |         |                                                                                                                                                                                                                                                                                                                                                                                                                                                                                                                                                                                                        |
| Background/rationale         | 2       | Explain the scientific background and rationale for the investigation being reported<br><i>Page 6</i>                                                                                                                                                                                                                                                                                                                                                                                                                                                                                                  |
| Objectives                   | 3       | State specific objectives, including any prespecified hypotheses<br><i>Page 6</i>                                                                                                                                                                                                                                                                                                                                                                                                                                                                                                                      |
| <b>Methods</b>               |         |                                                                                                                                                                                                                                                                                                                                                                                                                                                                                                                                                                                                        |
| Study design                 | 4       | Present key elements of study design early in the paper<br><i>Page 6</i>                                                                                                                                                                                                                                                                                                                                                                                                                                                                                                                               |
| Setting                      | 5       | Describe the setting, locations, and relevant dates, including periods of recruitment, exposure, follow-up, and data collection<br><i>Page 7</i>                                                                                                                                                                                                                                                                                                                                                                                                                                                       |
| Participants                 | 6       | (a) <i>Cohort study</i> —Give the eligibility criteria, and the sources and methods of selection of participants. Describe methods of follow-up<br><i>Page 7-8</i><br><i>Case-control study</i> —Give the eligibility criteria, and the sources and methods of case ascertainment and control selection. Give the rationale for the choice of cases and controls<br><i>Cross-sectional study</i> —Give the eligibility criteria, and the sources and methods of selection of participants                                                                                                              |
|                              |         | (b) <i>Cohort study</i> —For matched studies, give matching criteria and number of exposed and unexposed<br><i>Not matched. Exposed/unexposed page 9-10</i><br><i>Case-control study</i> —For matched studies, give matching criteria and the number of controls per case                                                                                                                                                                                                                                                                                                                              |
| Variables                    | 7       | Clearly define all outcomes, exposures, predictors, potential confounders, and effect modifiers. Give diagnostic criteria, if applicable<br><i>Page 8</i>                                                                                                                                                                                                                                                                                                                                                                                                                                              |
| Data sources/<br>measurement | 8*      | For each variable of interest, give sources of data and details of methods of assessment (measurement). Describe comparability of assessment methods if there is more than one group<br><i>Page 8</i>                                                                                                                                                                                                                                                                                                                                                                                                  |
| Bias                         | 9       | Describe any efforts to address potential sources of bias<br><i>Page 15-16</i>                                                                                                                                                                                                                                                                                                                                                                                                                                                                                                                         |
| Study size                   | 10      | Explain how the study size was arrived at<br><i>Page 8</i>                                                                                                                                                                                                                                                                                                                                                                                                                                                                                                                                             |
| Quantitative variables       | 11      | Explain how quantitative variables were handled in the analyses. If applicable, describe which groupings were chosen and why<br><i>Page 10</i>                                                                                                                                                                                                                                                                                                                                                                                                                                                         |
| Statistical methods          | 12      | (a) Describe all statistical methods, including those used to control for confounding<br><i>Page 10</i><br>(b) Describe any methods used to examine subgroups and interactions<br><i>Page 12</i><br>(c) Explain how missing data were addressed<br><i>Page 8</i><br>(d) <i>Cohort study</i> —If applicable, explain how loss to follow-up was addressed<br><i>Not applicable</i><br><i>Case-control study</i> —If applicable, explain how matching of cases and controls was addressed<br><i>Cross-sectional study</i> —If applicable, describe analytical methods taking account of sampling strategy |
|                              |         | (e) Describe any sensitivity analyses<br><i>Not applicable</i>                                                                                                                                                                                                                                                                                                                                                                                                                                                                                                                                         |

**Results**

|                  |     |                                                                                                                                                                                                                                                                                                                                                                                                                                                                   |
|------------------|-----|-------------------------------------------------------------------------------------------------------------------------------------------------------------------------------------------------------------------------------------------------------------------------------------------------------------------------------------------------------------------------------------------------------------------------------------------------------------------|
| Participants     | 13* | (a) Report numbers of individuals at each stage of study—eg numbers potentially eligible, examined for eligibility, confirmed eligible, included in the study, completing follow-up, and analysed <i>Page 8</i><br>(b) Give reasons for non-participation at each stage <i>Page 8</i><br>(c) Consider use of a flow diagram <i>Not applicable</i>                                                                                                                 |
| Descriptive data | 14* | (a) Give characteristics of study participants (eg demographic, clinical, social) and information on exposures and potential confounders <i>Page 9</i><br>(b) Indicate number of participants with missing data for each variable of interest <i>Page 10</i><br>(c) <i>Cohort study</i> —Summarise follow-up time (eg, average and total amount) <i>Page 8</i>                                                                                                    |
| Outcome data     | 15* | <i>Cohort study</i> —Report numbers of outcome events or summary measures over time <i>Page 11</i><br><i>Case-control study</i> —Report numbers in each exposure category, or summary measures of exposure<br><i>Cross-sectional study</i> —Report numbers of outcome events or summary measures                                                                                                                                                                  |
| Main results     | 16  | (a) Give unadjusted estimates and, if applicable, confounder-adjusted estimates and their precision (eg, 95% confidence interval). Make clear which confounders were adjusted for and why they were included <i>Page 11-12</i><br>(b) Report category boundaries when continuous variables were categorized <i>Page 9</i><br>(c) If relevant, consider translating estimates of relative risk into absolute risk for a meaningful time period <i>Not relevant</i> |
| Other analyses   | 17  | Report other analyses done—eg analyses of subgroups and interactions, and sensitivity analyses <i>Page 12</i>                                                                                                                                                                                                                                                                                                                                                     |

**Discussion**

|                  |    |                                                                                                                                                                                           |
|------------------|----|-------------------------------------------------------------------------------------------------------------------------------------------------------------------------------------------|
| Key results      | 18 | Summarise key results with reference to study objectives <i>Page 12</i>                                                                                                                   |
| Limitations      | 19 | Discuss limitations of the study, taking into account sources of potential bias or imprecision. Discuss both direction and magnitude of any potential bias <i>Page 15-16</i>              |
| Interpretation   | 20 | Give a cautious overall interpretation of results considering objectives, limitations, multiplicity of analyses, results from similar studies, and other relevant evidence <i>Page 17</i> |
| Generalisability | 21 | Discuss the generalisability (external validity) of the study results <i>Page 16</i>                                                                                                      |

**Other information**

|         |    |                                                                                                                                                                              |
|---------|----|------------------------------------------------------------------------------------------------------------------------------------------------------------------------------|
| Funding | 22 | Give the source of funding and the role of the funders for the present study and, if applicable, for the original study on which the present article is based <i>Page 17</i> |
|---------|----|------------------------------------------------------------------------------------------------------------------------------------------------------------------------------|

\*Give information separately for cases and controls in case-control studies and, if applicable, for exposed and unexposed groups in cohort and cross-sectional studies.

**Note:** An Explanation and Elaboration article discusses each checklist item and gives methodological background and published examples of transparent reporting. The STROBE checklist is best used in conjunction with this article (freely available on the Web sites of PLoS Medicine at <http://www.plosmedicine.org/>, Annals of Internal Medicine at <http://www.annals.org/>, and Epidemiology at <http://www.epidem.com/>). Information on the STROBE Initiative is available at [www.strobe-statement.org](http://www.strobe-statement.org).

# BMJ Open

## Does having a coordinator during occupational treatment and rehabilitation in Norway promote return to work? The rapid-return-to-work cohort study

|                                 |                                                                                                                                                                                                                                                                                                                                                                                                                                                                                                                                    |
|---------------------------------|------------------------------------------------------------------------------------------------------------------------------------------------------------------------------------------------------------------------------------------------------------------------------------------------------------------------------------------------------------------------------------------------------------------------------------------------------------------------------------------------------------------------------------|
| Journal:                        | <i>BMJ Open</i>                                                                                                                                                                                                                                                                                                                                                                                                                                                                                                                    |
| Manuscript ID                   | bmjopen-2018-024597.R1                                                                                                                                                                                                                                                                                                                                                                                                                                                                                                             |
| Article Type:                   | Research                                                                                                                                                                                                                                                                                                                                                                                                                                                                                                                           |
| Date Submitted by the Author:   | 29-Nov-2018                                                                                                                                                                                                                                                                                                                                                                                                                                                                                                                        |
| Complete List of Authors:       | Skarpaas, Lisebet; Oslo Metropolitan University, Department of Occupational Therapy, Prosthetics and Orthotics; Presenter - Making Sense of Science<br>Haveraaen, Lise; Presenter - Making Sense of Science<br>Småstuen, Milada; Oslo Metropolitan University, Department of Nursing and Health Promotion<br>Shaw, William; University of Massachusetts Medical School, Division of Occupational & Environmental Medicine<br>Aas, Randi; Presenter – Making Sense of Science; University of Stavanger, Department of Public Health |
| <b>Primary Subject Heading</b>: | Health services research                                                                                                                                                                                                                                                                                                                                                                                                                                                                                                           |
| Secondary Subject Heading:      | Occupational and environmental medicine, Public health, Rehabilitation medicine                                                                                                                                                                                                                                                                                                                                                                                                                                                    |
| Keywords:                       | Return to work, Occupational rehabilitation, Sick leave, Return to work coordination, Return to work programs                                                                                                                                                                                                                                                                                                                                                                                                                      |
|                                 |                                                                                                                                                                                                                                                                                                                                                                                                                                                                                                                                    |

SCHOLARONE™  
Manuscripts

1  
2  
3 **Does having a coordinator during occupational treatment and rehabilitation in Norway**  
4 **promote return to work? The rapid-return-to-work cohort study**  
5  
6  
7  
8  
9

10 Lisebet Skeie Skarpaas<sup>1,2</sup>, Lise Aasen Haveraaen<sup>1</sup>, Milada Cvancarova Småstuen<sup>3</sup>, William S.  
11 Shaw<sup>4</sup>, and Randi Wågø Aas<sup>1,2,5</sup>  
12  
13  
14  
15

16  
17 <sup>1</sup>Presenter – Making Sense of Science, Stavanger, Norway  
18

19 <sup>2</sup>Department of Occupational Therapy, Prosthetics and Orthotics, Oslo Metropolitan University,  
20 Oslo, Norway  
21  
22

23 <sup>3</sup>Department of Nursing and Health Promotion, Oslo Metropolitan University, Oslo, Norway  
24  
25

26 <sup>4</sup>University of Massachusetts Medical School, Division of Occupational & Environmental  
27 Medicine, Worcester, MA, USA  
28  
29

30 <sup>5</sup>Department of Public Health, Faculty of Health Sciences, University of Stavanger, Stavanger,  
31 Norway  
32  
33  
34  
35  
36

37 Corresponding author:  
38

39 Lisebet Skeie Skarpaas  
40

41 Faculty of Health Sciences, Oslo Metropolitan University  
42  
43

44 Postbox 4 St. Olavs plass, N-0130 Oslo, Norway  
45

46 lisebet.skeie.skarpaas@oslomet.no  
47  
48

49 +47 971 63 337  
50  
51  
52

53 Word count: 3807  
54  
55  
56  
57  
58  
59  
60

1  
2  
3 **Does having a coordinator during occupational treatment and rehabilitation in Norway**  
4 **promote return to work? The rapid-return-to-work cohort study**  
5  
6  
7

8  
9 **ABSTRACT**  
10

11 **Objectives:** The aim of this study was to assess if the reported provision of a coordinator was  
12 associated with time to first- and first full- return to work (RTW) amongst sick-listed employees  
13 who participated in different Rapid-RTW programs in Norway.  
14  
15

16  
17  
18 **Design:** The study was designed as a cohort study.  
19

20  
21  
22 **Setting:** Rapid-RTW-programs financed by the Regional Health Authority in hospitals (RHF)  
23 and Norwegian Labour and Welfare Administration (NAV) in Norway.  
24

25  
26 **Participants:** The sample included employees on full-time sick-leave (n=326) who participated  
27 in Rapid-RTW-programs (n=43), who provided information about the coordination of the  
28 services they received. The median age was 46 years (min-max. 21-67), and 71% were female.  
29 The most common reported diagnoses were musculoskeletal- (57%) and mental health disorders  
30 (14%).  
31  
32

33  
34  
35  
36 **Interventions:** The employees received different types of individually tailored RTW-programs  
37 all aimed at a rapid RTW; occupational rehabilitation (64%), treatment for medical or  
38 psychological issues, including assessment, and surgery (26%), and follow-up and work  
39 clarification services (10%). It was common to be provided with a coordinator (73%).  
40  
41  
42

43  
44 **Primary and secondary outcome measures:** Outcomes were measured as time to first-RTW  
45 (graded and 100%) and first full-RTW (100%).  
46

47  
48 **Results:** Employees provided with a coordinator returned to work later than employees who did  
49 not have a coordinator; a median (95% CI) of 128 (80-176) days versus 61 (43-79) days for first-  
50 RTW, respectively. This difference did not remain statistically significant in the adjusted  
51 regression analysis. For full RTW, there was no statistically significant difference between  
52 employees provided with a coordinator versus those who was not.  
53  
54  
55  
56  
57



1  
2  
3  
4  
5 **Conclusions:** The model of coordination provided in the Norwegian rapid-RTW-programs, did  
6 not contribute to a more rapid RTW for sick listed employees. Rethinking how return to work  
7 coordination should be organised could be wise in future program development.  
8  
9

10  
11 **Keywords:** Return to work, occupational rehabilitation, sick leave, return to work coordination,  
12 return to work programs  
13  
14

### 15 16 17 **Article Summary**

#### 18 19 20 **Strengths and limitations of this study**

- 21 - This study is strengthened by use of register data on sickness absence
- 22 - This study is strengthened by the number of included employees
- 23 - The study could be strengthened with smaller difference in n between employees  
24 with/without a coordinator  
25  
26  
27  
28  
29  
30  
31  
32  
33  
34  
35  
36  
37  
38  
39  
40  
41  
42  
43  
44  
45  
46  
47  
48  
49  
50  
51  
52  
53  
54  
55  
56  
57  
58  
59  
60

## INTRODUCTION

Prolonged sick leave can lead to permanent work disability. Work disability gives health, social and economic consequences for the worker, employer, as well as for society<sup>1</sup>. Therefore, interventions facilitating a rapid return to work (RTW) are of importance, both at an individual and at a socioeconomic level<sup>1</sup>. The most common diagnostic groupings that cause sick leave in Norway are musculoskeletal disorders (MSD) and mental disorders, which constitute approximately 40% and 20% of the total number of lost sick leave days, respectively<sup>2</sup>. This is in line with other western countries<sup>1 3</sup>.

To prevent permanent work disability, there has been increasing focus on the role of coordination of RTW-processes and RTW-programs. RTW-coordinators are well established as a part of RTW-programs in many western countries<sup>4</sup>. Insurers, employers, or governmental agencies often employ the coordinators<sup>5</sup>. In Norway, however, there are no formal guidelines or requirements for RTW-coordinators. Still, persons in need for long-lasting and coordinated services within health care and social services have a statutory right for an Individual plan, a management tool for holistic coordination, administered by a coordinator<sup>6 7</sup>. Furthermore, the government has implemented a coordination reform, seeking to offer service users more comprehensive and continuous services<sup>8</sup>. This reflects the government's expectation that RTW-programs cooperate and coordinate their services across stakeholders and arenas. In addition, several initiatives to promote rapid RTW have been implemented, both in the workplace arena and towards RTW-programs<sup>9-11</sup>. Our recent study of The Rapid-RTW-program, the largest RTW-program in Norway, revealed that approximately two thirds of the employees in the program had a coordinator. However, these coordinators mainly coordinated services within their own

1  
2  
3 programs, not between the intervention arenas (i.e. workplace, social insurance, and health care),  
4 referred to as horizontal integration<sup>12 13</sup>. Furthermore, most of the employees with a coordinator  
5 received occupational rehabilitation services, and were sick-listed with MSD<sup>12</sup>.  
6  
7  
8  
9

10  
11 Environmental interventions such as adjustments and accommodation at the workplace, have  
12 been found to be important for work reintegration amongst persons on sick leave due to MSD<sup>14</sup>-  
13  
14  
15  
16  
17  
18  
19  
20  
21  
22  
23  
24  
25  
26  
27  
28  
29  
30  
31  
32  
33  
34  
35  
36  
37  
38  
39  
40  
41  
42  
43  
44  
45  
46  
47  
48  
49  
50  
51  
52  
53  
54  
55  
56  
57  
58  
59  
60  
16. Recent reviews have further documented the workplace as an important arena for RTW-  
programs directed at employees with mental health problems<sup>17 18</sup>. Inclusion of the workplace in  
RTW-programs requires cooperation between several stakeholders across different arenas and  
levels of the health and welfare system<sup>9 19 20</sup>. To enhance such cooperation, provision of RTW-  
coordinators has been tested in several countries, using various models for different groups of  
patients<sup>21-26</sup>.

Although the use of RTW-coordinators has received increasing attention, there is some debate  
about the effect of the coordinators for RTW. A recent review conducted by Vogel and  
colleagues (2017), concludes that there is no evidence that coordinated RTW-programs facilitate  
RTW compared to usual care<sup>27</sup>. The coordinated RTW-programs in the review were defined as  
those identifying barriers to RTW and providing a designated coordinator to overcome these  
barriers through multi-professional interventions, with several stakeholders involved and a face-  
to-face contact between employee and the coordinator<sup>27</sup>. However, the included programs were  
of various content, set-up and duration. Several of the studies included in the review were carried  
out in Norway<sup>28</sup>, Sweden<sup>29</sup> and Denmark<sup>23 30 31</sup>, indicating the review's<sup>27</sup> relevance for the  
Scandinavian welfare states. The programs described in the review are comparable to the Rapid-  
RTW-program in Norway in regard to their complexity and the aim to promote RTW<sup>12 27 32</sup>, but

1  
2  
3 might differ in their focus on barriers to RTW and stakeholder cooperation that are reported  
4  
5 lacking in the Rapid-RTW-programs<sup>12</sup>.  
6  
7  
8  
9

10 In contrast, several studies have found that RTW-coordination and provision of a RTW-  
11  
12 coordinator is positively association with time-to-RTW, and there is increasing evidence stating  
13  
14 that these components are important in occupational rehabilitation<sup>4 24 33-35</sup>. Furthermore, lack of  
15  
16 coordination is associated with prolonged RTW, and some studies have reported that lack of  
17  
18 coordination can complicate the RTW-process<sup>36</sup>. Reviews have documented RTW-coordination  
19  
20 as an important intervention predictor for RTW<sup>15 34 37-41</sup>, and interventions including stakeholders  
21  
22 at both rehabilitation program and the workplace have been found to be successful for RTW<sup>34 37</sup>  
23  
24  
25  
26  
27  
28  
29  
30  
31  
32  
33  
34  
35  
36  
37  
38  
39  
40  
41  
42  
43  
44  
45  
46  
47  
48  
49  
50  
51  
52  
53  
54  
55  
56  
57  
58  
59  
60  
41 42. A recent review recommend implementation of RTW-programs towards sick listed  
employees consisting of multiple components, where service coordination was one of three in  
addition to health-focused and work modification components<sup>43</sup>.

In light of these contradictions, the aim of this study was to assess if the reported provision of a  
coordinator was associated with a more rapid time to first- and first full- return to work (RTW)  
amongst sick-listed employees who participated in different public and private Rapid-RTW  
programs in Norway.

## METHODS

### Design

The study was designed as a longitudinal cohort study of 326 employees on full-time sick leave,  
from 43 different Rapid-RTW programs in Norway.

## Setting

The present study is one of several studies in an evaluation of the national RTW-program in Norway, the Rapid-RTW-project. The Rapid RTW-program is a national program for patients on sick leave or at risk for sickness absence, aimed at reducing time to RTW and shorting the waiting-time for treatment. To this date, the program is the largest effort for promoting a fast and safe RTW in Norway<sup>10</sup>. The national program was implemented in 2007 and has an annual budget of NOK 700 million (approximately \$82 million). This initiative allowed for services to respond to tenders in order to get funding to develop and drift RTW-programs, and prioritize patients in a work relation for assessment, treatment and rehabilitation. The funding of the national program will from 2018 be implemented in the health and welfare services' ordinary budgets<sup>44</sup>. The national program includes approximately 200 different public and private RTW-programs, and is organised by the Regional Health Authorities (RHF) and the Norwegian Labour and Welfare Administration (NAV). The main types of programs are [1] occupational rehabilitation, both inpatient and outpatient, [2] assessment and follow-up services by the social security system (NAV), and [3] medical or psychological treatment, including assessment, and surgery<sup>10</sup>. The organization, content and intervention components, like the provision of a coordinator, were decided in each of the rapid-RTW-programs.

## Data collection

All of the approximately 200 clinics or institutions offering Rapid-RTW services were invited to participate in the study. Programs that agreed to participate provided a local study coordinator, who recruited employees to the study in the period from February to December 2012. Both employees and their providers answered self-administered questionnaires about the employees'

1  
2  
3 health situation and the service they received, including the question “Did the program provide a  
4 person who tailored or coordinated your services?”. They could choose to answer on paper, or  
5 digitally. Data on sickness absence was retrieved from the Norwegian Social Insurance Register.  
6  
7 Data on type of services employees received were retrieved from the Norwegian Patient Registry.  
8  
9 The register data was linked to the self-reported data using eleven-digit personal identification  
10 numbers. Each individual living in Norway is provided with a unique ID number that enables  
11 data from different registries to be linked.  
12  
13  
14  
15  
16  
17  
18  
19  
20

### 21 **Outcome measures**

22  
23 The outcome was defined as time to first-RTW and first full-RTW. Time was measured as days  
24 from when the employee started treatment at the RTW-program until the first day back at work,  
25 either partial or full job size (first-RTW), and until the employee for the first time returned to  
26 work in the same job size they had before (first- or full-RTW). These were therefore overlapping,  
27 and not mutually exclusive time frames. This way of measuring RTW is in line with previous  
28 research studies on time-to RTW<sup>45-47</sup>. The employees were followed for 360 days, and those who  
29 did not return within the follow-up time were censored in the analyses.  
30  
31  
32  
33  
34  
35  
36  
37  
38  
39  
40  
41

### 42 **Patient and public involvement**

43  
44 Patients were not involved in development of research question and outcome measure, nor  
45 design, recruitment or conduction of the study. The results will be made available through plain  
46 language synopsis and communicated to the public once published scientifically.  
47  
48  
49  
50  
51

### 52 **Participants**

53  
54 In total, 679 employees completed the questionnaire in the main cohort study. In the present  
55  
56  
57  
58  
59  
60

study, 326 sick-listed employees who [1] answered the question regarding having a coordinator or not, [2] replied yes/no to the question of provision of a coordinator, [3] were on full-time sick leave at start of the RTW-program were included in the analyses. Reasons for exclusion were accordingly: [1] employees did not answer (n=185), [2] employees answered “do not know” (n=120), and [3] employees were on graded sick leave (n=168). Some contributed to more than one reason.

The samples' characteristics are presented in Table 1. The employees' median age was 46 years (min.-max. 21-67), and the majority had been sick-listed before (96%). The most common diagnoses were musculoskeletal disorders (MSD) (57%) and mental health problems (14%). The most common type of RTW-program provided was occupational rehabilitation (63%), which included rehabilitation in hospitals and institutions, both inpatient and outpatient. These types of services are explained in earlier publications<sup>10 12</sup>. Of the included participants, 73% were provided with a coordinator.

Table 1: Participants

| Variable           | Category                          | n   | %  |
|--------------------|-----------------------------------|-----|----|
| Gender             | Female                            | 232 | 71 |
|                    | Male                              | 94  | 29 |
| Age*               | Up to 30 years                    | 27  | 8  |
|                    | 31 - 49 years                     | 175 | 54 |
|                    | 50 years +                        | 123 | 38 |
| Marital Status*    | Living with partner               | 219 | 68 |
|                    | Not living with partner           | 105 | 32 |
| Educational Level* | Elementary school (up to 9 years) | 38  | 12 |
|                    | Upper secondary school (12 years) | 154 | 48 |
|                    | University degree (up to 4 years) | 93  | 29 |
|                    | University degree (> 4 years)     | 35  | 11 |
| Diagnosis          | Musculoskeletal                   | 185 | 57 |

|                             |                                                                       |     |    |
|-----------------------------|-----------------------------------------------------------------------|-----|----|
|                             | Psychiatric                                                           | 45  | 14 |
|                             | Others incl. cardiovascular                                           | 35  | 11 |
|                             | Cancer                                                                | 32  | 10 |
|                             | No diagnosis                                                          | 16  | 5  |
|                             | Unspecific                                                            | 13  | 4  |
| Symptoms*                   | Pain at rest (yes)                                                    | 267 | 85 |
|                             | Pain in activity (yes)                                                | 277 | 89 |
|                             | Depressive mood (yes)                                                 | 244 | 78 |
|                             | Anxiety (yes)                                                         | 191 | 60 |
| Type of RTW-program*        | Occupational rehabilitation                                           | 206 | 64 |
|                             | Medical or psychological treatment, including assessment, and surgery | 84  | 26 |
|                             | Follow-up and Work clarification services                             | 32  | 10 |
| Provided with a coordinator | Yes                                                                   | 237 | 73 |
| Sector*                     | Public                                                                | 148 | 48 |
|                             | Private                                                               | 158 | 52 |
| History of sickness absence | Yes                                                                   | 314 | 96 |

Note: data on all participants except \*Missing; age n=1, marital status n=2, educational level n=6, symptoms (pain at rest n=10, pain in activity n=15, depressive mood n=11, anxiety n=10), type of RTW-program n=4, sector n=20.

## Statistical analyses

Diagnoses were registered as ICPC or ICD codes by the physician in the medical records, and categorised into the largest diagnostic groups “MSD”, “psychiatric disorders”, “cancer” and “common/unspecific disorders”, other diagnosis (including neurological and heart disorders), or missing/no diagnosis, for the descriptive analysis. For the regression analysis, the categories common/unspecific, other diagnoses and missing/no diagnosis were collapsed. Time to first-RTW and full-RTW were calculated using the Kaplan-Meier method, and crude differences between those who had and did not have a coordinator were assessed with log-rank tests.

Stepwise Cox regression models were used to calculate the probability for returning to work (first-RTW and first full-RTW) for employees with a coordinator versus those who had not.

Potential confounders for RTW were entered into the models. The confounders were identified in earlier studies in the literature<sup>45 48-50</sup>, and included variables such as age, gender, educational



1  
2  
3 level, marital status, diagnosis, self-reported symptoms (pain at rest, pain in activity, depressive  
4 mood, and anxiety), sick leave history, household income, and type of service. The results were  
5 expressed as hazard ratios (HR) with 95 % Confidence Intervals (CI). P-values of <0.05 were  
6 considered statistically significant and all tests were two-sided. The analyses were conducted in  
7 IBM SPSS Statistics 24.  
8  
9  
10  
11  
12  
13  
14  
15  
16

## 17 **RESULTS**

### 18 **Unadjusted results**

19  
20 Having a coordinator was associated with delayed time to first-RTW (Figure 1). In the unadjusted  
21 analyses, employees who had a coordinator experienced a first-RTW after 128 days (median;  
22 95% CI: 80-176) compared to 61 days (95% CI: 43-79) for those who did not. This difference  
23 was statistically significant.  
24  
25  
26  
27  
28  
29  
30  
31  
32  
33

34 *Insert Figure 1*

35  
36  
37  
38 The unadjusted results for first full-RTW showed that patients who had a coordinator returned to  
39 work a median of 57 days later than employees who did not have a coordinator; a median of 185  
40 days (95% CI 137-233) versus 128 days (95% CI 72-184), respectively (Figure 2). However, this  
41 difference did not reach the level of statistical significance (p=0.24).  
42  
43  
44  
45  
46  
47  
48  
49

50 *Insert Figure 2*

### 51 **Adjusted results**

In the adjusted analysis, we controlled for age, gender, educational level, marital status, diagnosis, sick leave history, symptoms, household income, and type of program. Neither time to first-RTW nor first full-RTW was statistical significant in the adjusted analysis, with a hazard ratio of 0.75 (95% CI 0.51-1.10) for first-RTW, and 0.82 (95% CI 0.55-1.22) for first full-RTW (Table 2).

Table 2: The probability of experiencing a first- and full RTW

|                                     | Unadjusted |           |         | Adjusted* |           |         |
|-------------------------------------|------------|-----------|---------|-----------|-----------|---------|
|                                     | HR         | 95 % CI   | p-value | HR        | 95 % CI   | p-value |
| First-RTW<br>Having a coordinator** | 0.70       | 0.53-0.94 | 0.02    | 0.75      | 0.51-1.10 | 0.14    |
| Full-RTW<br>Having a coordinator**  | 0.83       | 0.62-1.13 | 0.24    | 0.82      | 0.55-1.22 | 0.32    |

Notes: \*adjusted for age, gender, marital status, educational level, household income, diagnosis, type of RTW-program, symptoms (pain at rest, pain in activity, depressive mood, and anxiety), and history of sickness absence, \*\* ref not having a coordinator

Only type of RTW-program was a confounding factor between having a coordinator and RTW.

In a stepwise adjusted analysis, time to first-RTW remained statistically significant associated with having a coordinator when the other control variables were added to the model except type of program (HR 0.72 CI 0.52-0.99). In order to understand differences between coordinator and type of program in the model, time to first-RTW for the different program types was assessed.

The difference in time to first-RTW was statistical significant when comparing the program types; Occupational rehabilitation had a median of 109 days before RTW (95% CI 52-166) and differed from Assessment and follow-up programs through NAV which had a median of 238 days (95% CI 192-284). Medical or psychological treatment, including assessment, and surgery had a median of 55 days (95% CI 37-73) and also differed from Assessment and follow-up

1  
2  
3 programs through NAV. Figure 3 shows RTW-rates (first-RTW within 360 days yes/no) by type  
4  
5 of program. Of employees participated in Medical or psychological treatment, including  
6  
7 assessment, and surgery, 88 % (n=74) had returned to work within the first year. The RTW-rates  
8  
9 for employees that participated in Occupational rehabilitation or Assessment and follow-up  
10  
11 programs through NAV were approximately 63 %.  
12  
13  
14  
15  
16

17 *Insert Figure 3*  
18  
19  
20

21 Furthermore, the provision of a coordinator varied between different types of RTW-programs.  
22  
23 For the program types Occupational rehabilitation and Assessment and follow-up programs  
24  
25 through NAV, 72.4 % and 76% respectively were provided with a coordinator. For Medical or  
26  
27 psychological treatment, including assessment, and surgery 50% of the sick-listed employees  
28  
29 were provided with a coordinator. Being provided with a coordinator were almost three times  
30  
31 more likely in Occupational rehabilitation and Assessment and follow-up programs through NAV  
32  
33 than in Medical or psychological treatment, including assessment, and surgery (OR 2.7, 95% CI  
34  
35 1.3-5.5).  
36  
37  
38  
39  
40  
41

## 42 **DISCUSSIONS**

43

44 This study assessed whether provision of a coordinator was associated with time to first-RTW  
45  
46 and first full-RTW in a cohort of sick-listed employees who participated in the Rapid-RTW  
47  
48 program in Norway. The results show that having a coordinator did not enhance a more rapid  
49  
50 RTW. Even though participants provided with a coordinator had a delayed first return to work  
51  
52 compared to those who did not have a coordinator, the adjusted analyses revealed that the type of  
53  
54 program the sick listed employee received might be the mediating factor for this delay. These two  
55  
56  
57  
58  
59  
60

1  
2  
3 findings are discussed below.  
4  
5  
6

7  
8 First, the present study revealed that provision of a coordinator did not contribute to a more rapid  
9  
10 RTW for sick listed employees who participated in the Rapid-RTW program in Norway. This  
11  
12 result was somewhat unexpected. Even though there is some debate on the effect of coordination,  
13  
14 having a coordinator has been found to increase the probability of returning to work in several  
15  
16 previous studies<sup>24 34 35 51</sup>. The results may have several explanations. One explanation might be  
17  
18 that the coordinators in the present study were provided by the health care services<sup>12</sup>, and they  
19  
20 mostly coordinated their own services. In international studies, however, the coordinator is often  
21  
22 provided by the insurers, employers or governmental agencies<sup>5</sup>, making the coordinator more  
23  
24 directly linked to the workplace. The workplace is one of the most important arenas for RTW-  
25  
26 programs<sup>15 16</sup>, since early contact with the workplace, as well as adaptations and support at the  
27  
28 workplace, all are predictors for RTW<sup>15 34 39-42</sup>. As such, the coordinators in the present study  
29  
30 might differ from the RTW-coordinators in international studies, both in regard to who provides  
31  
32 them and which of the intervention arenas they coordinate. A recent study from Norway found  
33  
34 that adding a workplace focus in a multidisciplinary RTW-program in the specialist health care  
35  
36 did not enhance RTW rates<sup>28</sup>. The coordination provided in the study resulted in a weak  
37  
38 connection between the RTW-program and the workplace<sup>28</sup>. Hence, it might be possible that the  
39  
40 model of coordination where the coordinator is placed in the specialist health care service,  
41  
42 without real possibilities to coordinate and accommodate *at* the workplace, does not facilitate  
43  
44  
45  
46  
47  
48  
49 RTW.  
50  
51  
52

53  
54 Secondly, although an association between having a coordinator and delayed RTW was found in  
55  
56 the univariate analysis, the delayed first-RTW did not reach statistical significance when  
57  
58  
59

1  
2  
3 controlling for type of program. This suggests type of program as a mediating factor for the delay  
4  
5 in RTW, and that the program type explains more of the variation in RTW than being provided  
6  
7 with a coordinator. Alternatively, the underlying cause for being referred to a specific type of  
8  
9 RTW-program may explain even more of the variation found in this study. The distribution of  
10  
11 coordinators varies across the different types of RTW-programs, and is most likely provided in  
12  
13 Assessment or follow-up services through NAV and Occupational rehabilitation<sup>12</sup>. Furthermore,  
14  
15 treatment programs are often provided to employees with specific MSD or mental disorders,  
16  
17 whereas employees referred to occupational rehabilitation services often have more complex  
18  
19 problems or situations<sup>10</sup>. This study shows, regardless of whether the employees are provided  
20  
21 with a coordinator, that the time to RTW doubles for employees receiving Occupational  
22  
23 rehabilitation compared to those receiving Treatment, and furthermore quadruples for those  
24  
25 receiving Assessment and follow-up services through NAV. Therefore, one explanation for the  
26  
27 delayed RTW for those provided with a coordinator may be that it is an expression of the  
28  
29 complexity of the employees' situation. A more complex situation for the sick listed employee, in  
30  
31 terms of for example co-morbid diagnoses<sup>52 53</sup>, or difficulties in regard to psychosocial factors at  
32  
33 work<sup>45 48</sup> may work as barriers for RTW. Severity of health problems may as well complicate the  
34  
35 RTW process, as shown in previous studies<sup>37 38</sup>. Pain may indicate higher experienced severity,  
36  
37 however, even though pain at rest is associated with provision of a coordinator in rapid-RTW-  
38  
39 programs<sup>12</sup>, pain is neither revealed as a predictor for provision of a coordinator<sup>12</sup>, nor a  
40  
41 significant explanatory factor for first- or full-RTW in this study. Another possible explanation is  
42  
43 connected to the complexity of the RTW-programs<sup>19</sup>. Some of the services include several  
44  
45 interventions and components<sup>10</sup>, and it is possible that the provision of a coordinator only adds to  
46  
47 an already full schedule of interventions. For some groups, "brief interventions" has been found  
48  
49 to be just as effective as multidisciplinary rehabilitation services with several intervention  
50  
51  
52  
53  
54  
55  
56  
57  
58  
59  
60

1  
2  
3 components<sup>30 54-56</sup>. Otherwise, if the services does not make room for enhancing contact with  
4 workplace and other stakeholders<sup>12</sup> the evidence based active elements of coordination may be  
5 absent, leading to delayed RTW or no effect.  
6  
7  
8  
9

10  
11  
12 Nevertheless, the findings in this study are in line with a recent systematic review<sup>27</sup>, as well as  
13 other studies on coordination from Scandinavia<sup>28 30</sup>, supporting the finding that coordination  
14 might not facilitate RTW. Could this be due to the coordinator model used in the Scandinavian  
15 welfare system? This seems at least to have something to do with the type of coordination, where  
16 integration of services across levels and arenas are lacking<sup>12</sup>. Furthermore, it might be that the  
17 groups receiving coordination is not well targeted. Still, we need to know more about who might  
18 benefit from having a coordinator. Coordination of RTW-processes for employees with mental  
19 health problems has for example been studied to a small extent<sup>27</sup>, and we do not know how  
20 coordination affects this group of sick-listed employees. Furthermore, there is a need to  
21 investigate and develop the roles, tasks and competencies of the RTW-coordinator, within a  
22 Norwegian context. The Norwegian model for coordination, where the link between the  
23 coordinator and the workplace is diffuse and not formalized in the RTW-programs<sup>10 12 57 58</sup>,  
24 should be further examined. Implications for practice and research, both in Norway and  
25 internationally, will be to develop new coordination models and implement such models in line  
26 with evidence, where a closer workplace connection seems to be a way forward<sup>27 28</sup>.  
27  
28  
29  
30  
31  
32  
33  
34  
35  
36  
37  
38  
39  
40  
41  
42  
43  
44  
45  
46  
47  
48

49 One of the strengths of this study is the high number of participants and the use of register data,  
50 which are both detailed and precise regarding sickness absence and diagnoses, as it is connected  
51 to the public social security benefit system. Approx. two-thirds of the patients in the study were  
52 provided with a coordinator, limiting the power to estimate the effect of not having a coordinator.  
53  
54  
55  
56  
57  
58  
59  
60

1  
2  
3 Although the variable of provision of a coordinator is based on self-report from employees in  
4 present study, the time-to first-RTW results from the analyses has been verified (median 102 days  
5 versus 79 days for those provided with coordinator versus not, respectively, with p-value 0.25)  
6 when compared with providers' responses to the same variable ("Did your service provide a  
7 coordinator for this patient?"). Furthermore, there was an association between having a  
8 coordinator and type of RTW-program. This make it difficult to generalize the findings to all sick  
9 listed employees participating in the Rapid-RTW-programs as we were not able to distinguish  
10 between the effect of having a coordinator and a given program. Additionally, the proportion of  
11 employees sick-listed due to MSD are higher than in the national statistics of Norway. However,  
12 since employees with MSD are the best-documented group of sick-listed benefiting from RTW-  
13 coordination, this should be more an advantage regarding possibilities of revealing a difference  
14 between those provided with and those not provided with a coordinator. There is a possibility of  
15 selection bias in the study as the percentage of employees sick listed with psychiatric issues and  
16 receiving psychological treatment is higher among the non-respondents. Fewer of employees  
17 with psychiatric issues is provided with a coordinator<sup>12</sup>, meaning the power of analysis of this  
18 diagnose group might have been enhanced if more of these employees responded. However,  
19 employees with this diagnosis represent a small proportion of the total number of included  
20 participants. Therefore, inclusion of those employees would most likely not affect the main  
21 results decisively. Analysis of the full material of employees on full-time sick leave (n=546)  
22 shows some statistically significant differences between respondents and non-respondents on the  
23 question of provision of a coordinator. Non-respondents' median age was slightly lower (44  
24 years), and more had mental diagnosis (20%). In addition, fewer received occupational  
25 rehabilitation of the non-respondents (43%). If these were included, the proportion of employees  
26 with mental health disorders receiving treatment would most likely be larger, and this would most  
27  
28  
29  
30  
31  
32  
33  
34  
35  
36  
37  
38  
39  
40  
41  
42  
43  
44  
45  
46  
47  
48  
49  
50  
51  
52  
53  
54  
55  
56  
57  
58  
59  
60

1  
2  
3 likely strengthen the present results.  
4  
5  
6

## 7 **CONCLUSION**

10  
11 This study revealed that employees participating in RTW-programs and who were provided with  
12 a coordinator had delayed time until they returned to work, compared to those who did not have a  
13 coordinator. However, type of program seems to be a mediating factor in this study, that explains  
14 more of the variation in RTW than being provided with a coordinator and this should be further  
15 investigated. The model of coordination provided in the Norwegian rapid-RTW-programs,  
16 mainly as part of occupational rehabilitation programs in the health care, seems to not add to a  
17 more rapid RTW. Hence, RTW-coordination where all three intervention arenas; the workplace,  
18 social services, and health care are targeted should be further developed, tested and studied.  
19  
20  
21  
22  
23  
24  
25  
26  
27  
28  
29  
30

## 31 **Ethical statement**

32  
33  
34 The Norwegian Centre for Research Data (NSD) approved this study with the reference number:  
35 28988. Furthermore, the Norwegian Data Protection Authority gave consent to handle person-  
36 identified information, reference number: 13/00141-5/KEL. Participants in the study gave  
37 informed consent.  
38  
39  
40  
41  
42  
43  
44

## 45 **Funding**

46  
47 This work was supported by the Norwegian Ministry of Labour, Oslo Metropolitan University,  
48 and Presenter – Making Sense of Science.  
49  
50  
51  
52  
53

## 54 **Acknowledgements**



1  
2  
3 We would like to thank the participants, and the 43 rapid-RTW-programs for their valued  
4 contribution to this study. Especially thanks to the study coordinator in each of the RTW-  
5 programs. We would further like to thank the Ministry of Labour and Social Affairs for co-  
6 funding the data collection of this study.  
7  
8  
9  
10  
11  
12  
13

### 14 **Author Contributions**

15  
16 LSS has been involved in data collection, performed the analysis of the material, and has been the  
17 main author of all parts of the drafted article.  
18

19  
20 LAH has been involved in data collection, contributed to the discussion, and has commented  
21 critically on the drafts.  
22  
23

24  
25 MCS has been involved in the analysis, and commented critically on the drafts.  
26

27  
28 WSS has contributed to the interpretation of data, and commented critically on the drafts.  
29

30  
31 RWA is the principal investigator and project manager of the Rapid-RTW project. She designed  
32 the cohort study, and managed and took part in all phases of this project. She planned the  
33 statistical analysis, and commented critically on the drafts.  
34  
35  
36  
37  
38  
39

### 40 **Declarations**

41  
42 The authors declare no conflicts of interests.  
43  
44  
45

### 46 **Consent for publication**

47  
48 Not applicable.  
49  
50  
51  
52  
53

### 54 **Availability of data and material**

55  
56 The datasets analysed during the current study are not publicly available due to research ethical  
57  
58  
59

considerations, but are available from the corresponding author on reasonable request.

## REFERENCES

1. OECD. *Sickness, disability and work: breaking the barriers: a synthesis of findings across OECD countries*. Paris: OECD, 2010.
2. NAV. *Utviklingen i sykefraværet, 3 . kvartal 2017*. In: Sundell T, ed.: *Arbeids- og velferdsdirektoratet*, 2017.
3. OECD. *Sick on the job? Myths and Realities about Mental Health and Work*. Mental Health and Work: OECD, 2012.
4. Shaw W, Hong QN, Pransky G, et al. A literature review describing the role of return-to-work coordinators in trial programs and interventions designed to prevent workplace disability. *Journal of Occupational Rehabilitation* 2008;18(1):2-15.
5. Pransky G, Shaw WS, Loisel P, et al. Development and validation of competencies for return to work coordinators. *Journal of Occupational Rehabilitation* 2010;20(1):41-48. doi: 10.1007/s10926-009-9208-x
6. Sosial- og h. *Individuell plan 2005 : veileder til forskrift om individuell plan*. Oslo: Sosial- og helsedirektoratet, 2005.
7. Hagen R, Johnsen E. *Styring Gjennom Samhandling: Samhandlingsreformen som Kasus*. In: Melby L, Tjora AH, eds. *Samhandling for helse*. Oslo: Gyldendal akademisk 2013.
8. Norway HaWA. *Samhandlingsreformen : rett behandling - på rett sted - til rett tid*. Oslo: Helse- og omsorgsdepartementet 2009.
9. Aas RW. *Workplace-based sick leave prevention and return to work. Exploratory studies [Ph.D. Thesis]*. Karolinska Institutet, 2011.
10. Aas R, Solberg A, Strupstad J. *Raskere tilbake. Organisering, kompetanse, mottakere og forløp i 120 tilbud til sykmeldte: IRIS*, 2011.
11. Lindoe P, Bakke Å, Aas RW. *Avtalen for et inkluderende arbeidsliv. Virkemidler fra nasjonalt nivå til ledernivå i oppfølgingen av sykemeldte. Tidsskrift for Arbejdsliv* 2006;8(2):68-89.
12. Skarpaas LS, Haveraaen LA, Småstuen MC, et al. Vertical or horizontal Return to Work Coordination? The Rapid-RTW Cohort study. *Submitted* 2018
13. Hvinden B. *Divided against itself : a study of integration in welfare bureaucracy*. Oslo: Scandinavian University Press 1994.
14. van Oostrom SH, van Mechelen W, Terluin B, et al. A participatory workplace intervention for employees with distress and lost time: a feasibility evaluation within a randomized controlled trial. *Journal of Occupational Rehabilitation* 2009;19(2):212-22. doi: 10.1007/s10926-009-9170-7
15. van Vilsteren M, van Oostrom SH, de Vet HC, et al. Workplace interventions to prevent work disability in workers on sick leave. *Cochrane Database Syst Rev* 2015;10:CD006955. doi: 10.1002/14651858.CD006955.pub3 [published Online First: 2015/10/06]
16. Nastasia I, Coutu M-F, Tcaciuc R. Topics and trends in research on non-clinical interventions aimed at preventing prolonged work disability in workers compensated for work-related musculoskeletal disorders (WRMSDs): a systematic, comprehensive literature review. *Disability And Rehabilitation* 2014;36(22):1841-56. doi: 10.3109/09638288.2014.882418
17. Nieuwenhuijsen K, Faber B, Verbeek JH, et al. Interventions to improve return to work in depressed people. *Cochrane Database of Systematic Reviews*;12:CD006237.

18. Pomaki G, Franche R-L, Murray E, et al. Workplace-Based Work Disability Prevention Interventions for Workers with Common Mental Health Conditions: A Review of the Literature. *Journal of Occupational Rehabilitation* 2012;22(2):182-95. doi: 10.1007/s10926-011-9338-9
19. Loisel P, Durand MJ, Berthelette D, et al. Disability Prevention: New Paradigm for the Management of Occupational Back Pain. *Disease Management & Health Outcomes* 2001;9(7):351-60.
20. Steenstra I, Cullen K, Irvin E, et al. A systematic review of interventions to promote work participation in older workers. *Journal of Safety Research* 2016:No Pagination Specified. doi: <http://dx.doi.org/10.1016/j.jsr.2016.12.004>
21. Anema JR, Steenstra IA, Bongers PM, et al. Multidisciplinary rehabilitation for subacute low back pain: Graded activity or workplace intervention or both? A randomized controlled trial. *Spine* 2007;32(3):291-98. doi: <http://dx.doi.org/10.1097/01.brs.0000253604.90039.ad>
22. Lander F, Friche C, Tornemand H, et al. Can we enhance the ability to return to work among workers with stress-related disorders? *BMC Public Health* 2009;9:372. doi: <https://dx.doi.org/10.1186/1471-2458-9-372>
23. Bültmann U, Sherson D, Olsen J, et al. Coordinated and tailored work rehabilitation: a randomized controlled trial with economic evaluation undertaken with workers on sick leave due to musculoskeletal disorders. *Journal of Occupational Rehabilitation* 2009;19(1):81-93. doi: 10.1007/s10926-009-9162-7
24. Varatharajan S, Cote P, Shearer HM, et al. Are work disability prevention interventions effective for the management of neck pain or upper extremity disorders? A systematic review by the Ontario Protocol for Traffic Injury Management (OPTIMa) collaboration. *Journal of Occupational Rehabilitation* 2014;24(4):692-708. doi: <https://dx.doi.org/10.1007/s10926-014-9501-1>
25. Hubbard G, Gray NM, Ayansina D, et al. Case management vocational rehabilitation for women with breast cancer after surgery: A feasibility study incorporating a pilot randomised controlled trial. *Trials* 2013;14 (1) (no pagination)(175) doi: <http://dx.doi.org/10.1186/1745-6215-14-175>
26. Poulsen OM, Aust B, Bjorner JB, et al. Effect of the Danish return-to-work program on long-term sickness absence: results from a randomized controlled trial in three municipalities. *Scandinavian Journal Of Work, Environment & Health* 2014;40(1):47-56. doi: 10.5271/sjweh.3383
27. Vogel N, Schandelmaier S, Zumbunn T, et al. Return-to-work coordination programmes for improving return to work in workers on sick leave. *Cochrane Database Syst Rev* 2017;3(3):CD011618. doi: 10.1002/14651858.CD011618.pub2
28. Myhre K, Marchand GH, Leivseth G, et al. The effect of work-focused rehabilitation among patients with neck and back pain: a randomized controlled trial. *Spine* 2014;39(24):1999-2006. doi: <https://dx.doi.org/10.1097/BRS.0000000000000610>
29. Lindh M, Lurie M, Sanne H. A randomized prospective study of vocational outcome in rehabilitation of patients with non-specific musculoskeletal pain: a multidisciplinary approach to patients identified after 90 days of sick-leave. *Scand J Rehabil Med* 1997;29(2):103-12.
30. Jensen C, Jensen OK, Christiansen DH, et al. One-year follow-up in employees sick-listed because of low back pain: randomized clinical trial comparing multidisciplinary and brief intervention. *Spine* 2011;36(15):1180-89.

31. Stapelfeldt CM, Christiansen DH, Jensen OK, et al. Subgroup analyses on return to work in sick-listed employees with low back pain in a randomised trial comparing brief and multidisciplinary intervention. *BMC Musculoskeletal Disorders* 2011;12:112-12.
32. Craig P, Dieppe P, Macintyre S, et al. Developing and evaluating complex interventions: the new Medical Research Council guidance. *BMJ (Clinical Research Ed)* 2008;337:a1655-a55. doi: 10.1136/bmj.a1655
33. MacEachen E, Clarke J, Franche R-L, et al. Systematic review of the qualitative literature on return to work after injury. *Scandinavian Journal Of Work, Environment & Health* 2006;32(4):257-69.
34. Franche R, Cullen K, Clarke J, et al. Workplace-based return-to-work interventions: a systematic review of the quantitative literature. *Journal of Occupational Rehabilitation* 2005;15(4):607-31.
35. Nevala N, Pehkonen I, Koskela I, et al. Workplace accommodation among persons with disabilities: A systematic review of its effectiveness and barriers or facilitators. *J Occup Rehabil* 2015;25(2):432-48. doi: <http://dx.doi.org/10.1007/s10926-014-9548-z>
36. Young AE, Wasiak R, Roessler RT, et al. Return-to-work outcomes following work disability: stakeholder motivations, interests and concerns. *Journal of Occupational Rehabilitation* 2005;15(4):543-56.
37. Cancelliere C, Donovan J, Stochkendahl MJ, et al. Factors affecting return to work after injury or illness: best evidence synthesis of systematic reviews. *Chiropractic & manual therapies* 2016;24(1):32. doi: 10.1186/s12998-016-0113-z [published Online First: 2016/09/10]
38. Rinaldo U, Selander J. Return to work after vocational rehabilitation for sick-listed workers with long-term back, neck and shoulder problems: A follow-up study of factors involved. *Work* 2016;55(1):115-31. doi: <https://dx.doi.org/10.3233/WOR-162387>
39. Williams-Whitt K, Bultmann U, Amick B, 3rd, et al. Workplace Interventions to Prevent Disability from Both the Scientific and Practice Perspectives: A Comparison of Scientific Literature, Grey Literature and Stakeholder Observations. *Journal of Occupational Rehabilitation* 2016;26(4):417-33. doi: <https://dx.doi.org/10.1007/s10926-016-9664-z>
40. Briand C, Durand M, St-Arnaud L, et al. How well do return-to-work interventions for musculoskeletal conditions address the multicausality of work disability? *Journal of Occupational Rehabilitation* 2008;18(2):207-17.
41. Franche R, Baril R, Shaw W, et al. Workplace-based return-to-work interventions: optimizing the role of stakeholders in implementation and research. *Journal of Occupational Rehabilitation* 2005;15(4):525-42.
42. Hoefsmit N, Houkes I, Nijhuis F. Intervention Characteristics that Facilitate Return to Work After Sickness Absence: A Systematic Literature Review. *Journal of Occupational Rehabilitation* 2012;22(4):462-77. doi: 10.1007/s10926-012-9359-z
43. Cullen KL, Irvin E, Collie A, et al. Effectiveness of Workplace Interventions in Return-to-Work for Musculoskeletal, Pain-Related and Mental Health Conditions: An Update of the Evidence and Messages for Practitioners. *Journal of Occupational Rehabilitation* 2018;28(1):1-15. doi: 10.1007/s10926-016-9690-x
44. Regjeringen. Prop. 1 S (2017–2018). In: omsorgsdepartementet H-o, ed. [www.regjeringen.no](http://www.regjeringen.no): Regjeringen, 2017.
45. Haverlaen LA, Skarpaas LS, Aas RW. Job demands and decision control predicted return to work: the rapid-RTW cohort study. *BMC Public Health* 2017;17:154. doi: 10.1186/s12889-016-3942-8

- 1
- 2
- 3
- 4 46. Flach PA, Groothoff JW, Krol B, et al. Factors associated with first return to work and sick
- 5 leave durations in workers with common mental disorders. *European journal of public*
- 6 *health* 2012;22(3):440-5. doi: 10.1093/eurpub/ckr102 [published Online First:
- 7 2011/08/16]
- 8 47. Nieuwenhuijsen K, Verbeek J, Siemerink J, et al. Quality of rehabilitation among workers
- 9 with adjustment disorders according to practice guidelines; a retrospective cohort study.
- 10 *Occupational and Environmental Medicine* 2003;60(Suppl 1):i21-i25. doi:
- 11 10.1136/oem.60.suppl\_1.i21
- 12 48. Haverlaen L, Berg JE, Skarpaas LS, et al. Do psychosocial job demands, decision control and
- 13 social support predict return to work after occupational rehabilitation or medical
- 14 treatment? The rapid-RTW study. *Work : A journal of Prevention, Assessment and*
- 15 *rehabilitation* 2016
- 16 49. Selander J, Marnetoft SU, Bergroth A, et al. Return to work following vocational
- 17 rehabilitation for neck, back and shoulder problems: risk factors reviewed. *Disabil*
- 18 *Rehabil* 2002;24(14):704-12. doi: 10.1080/09638280210124284 [published Online First:
- 19 2002/10/25]
- 20 50. Cornelius L, Klink J, Groothoff J, et al. Prognostic Factors of Long Term Disability Due to
- 21 Mental Disorders: A Systematic Review. *Journal of Occupational Rehabilitation*
- 22 2011;21(2):259-74. doi: 10.1007/s10926-010-9261-5
- 23 51. Schandelmaier S, Ebrahim S, Burkhardt SCA, et al. Return to work coordination programmes
- 24 for work disability: a meta-analysis of randomised controlled trials. *PLoS ONE*
- 25 2012;7(11):e49760-e60. doi: 10.1371/journal.pone.0049760
- 26 52. Huijs J, Koppes L, Taris T, et al. Differences in Predictors of Return to Work Among Long-
- 27 Term Sick-Listed Employees with Different Self-Reported Reasons for Sick Leave.
- 28 *Journal of Occupational Rehabilitation* 2012;22(3):301-11. doi: 10.1007/s10926-011-
- 29 9351-z
- 30 53. Laisné F, Lecomte C, Corbière M. Biopsychosocial predictors of prognosis in
- 31 musculoskeletal disorders: a systematic review of the literature (corrected and
- 32 republished) \*. *Disability And Rehabilitation* 2012;34(22):1912-41.
- 33 54. Aas RW, Skarpaas LS. The impact of a brief vs. multidisciplinary intervention on return to
- 34 work remains unclear for employees sick-listed with low back pain. *Australian*
- 35 *Occupational Therapy Journal* 2012;59(3):249-50. doi: 10.1111/j.1440-
- 36 1630.2012.01020.x
- 37 55. Brox JI, Storheim K, Grotle M, et al. Systematic review of back schools, brief education, and
- 38 fear-avoidance training for chronic low back pain. *The Spine Journal: Official Journal Of*
- 39 *The North American Spine Society* 2008;8(6):948-58.
- 40 56. Guzman J, Hayden J, Furlan AD, et al. Key Factors in Back Disability Prevention: A
- 41 Consensus Panel on Their Impact and Modifiability. *Spine* 2007;32(7):807-15.
- 42 57. Skarpaas L, Berg J, Ramvi E, et al. Eksperters synspunkter på tilbudet til sykmeldte i Norge.
- 43 Første runde av en delphi-studie. *Ergoterapeuten* 2017;60(1):78-89.
- 44 58. Skarpaas LS, Ramvi E, Løvereide L, et al. Maximizing work integration in job placement of
- 45 individuals facing mental health problems: Supervisor experiences. *Work* 2016;53(1):87-
- 46 98 12p. doi: 10.3233/WOR-152218
- 47
- 48
- 49
- 50
- 51
- 52
- 53
- 54
- 55
- 56
- 57
- 58
- 59
- 60

1  
2  
3 **Figure 1:** Kaplan-Meier survival plot of time until first-RTW (days)  
4

5 **Figure 2:** Kaplan-Meier survival plot of time until first full-RTW (days)  
6

7 **Figure 3:** RTW-rates (first-RTW within 360 days yes/no) by type of program  
8  
9  
10  
11  
12  
13  
14  
15  
16  
17  
18  
19  
20  
21  
22  
23  
24  
25  
26  
27  
28  
29  
30  
31  
32  
33  
34  
35  
36  
37  
38  
39  
40  
41  
42  
43  
44  
45  
46  
47  
48  
49  
50  
51  
52  
53  
54  
55  
56  
57  
58  
59  
60

For peer review only

1  
2  
3  
4  
5  
6  
7  
8  
9  
10  
11  
12  
13  
14  
15  
16  
17  
18  
19  
20  
21  
22  
23  
24  
25  
26  
27  
28  
29  
30  
31  
32  
33  
34  
35  
36  
37  
38  
39  
40  
41  
42  
43  
44  
45  
46  
47  
48  
49  
50  
51  
52  
53  
54  
55  
56  
57  
58  
59  
60

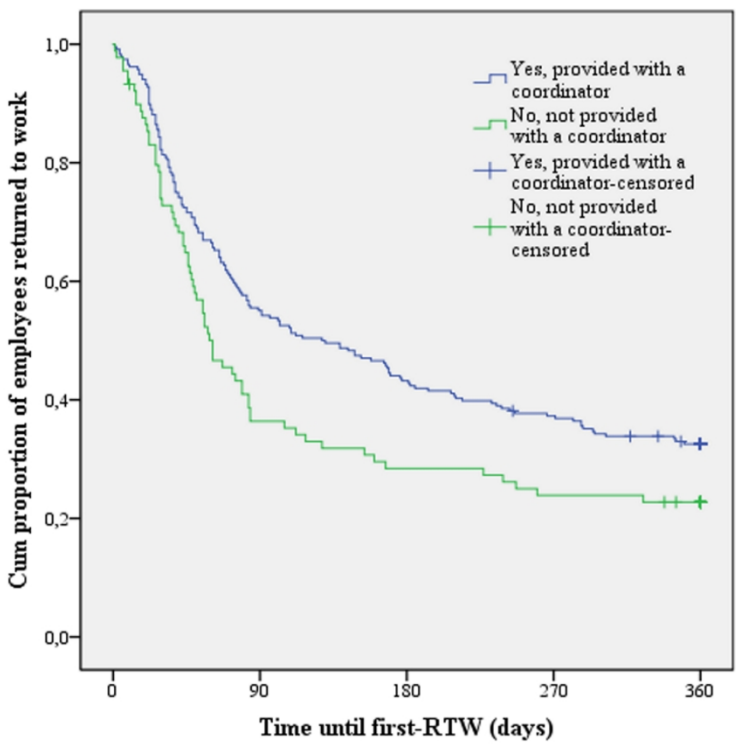

Figure 1: Kaplan-Meier survival plot of time until first-RTW (days)

357x285mm (300 x 300 DPI)

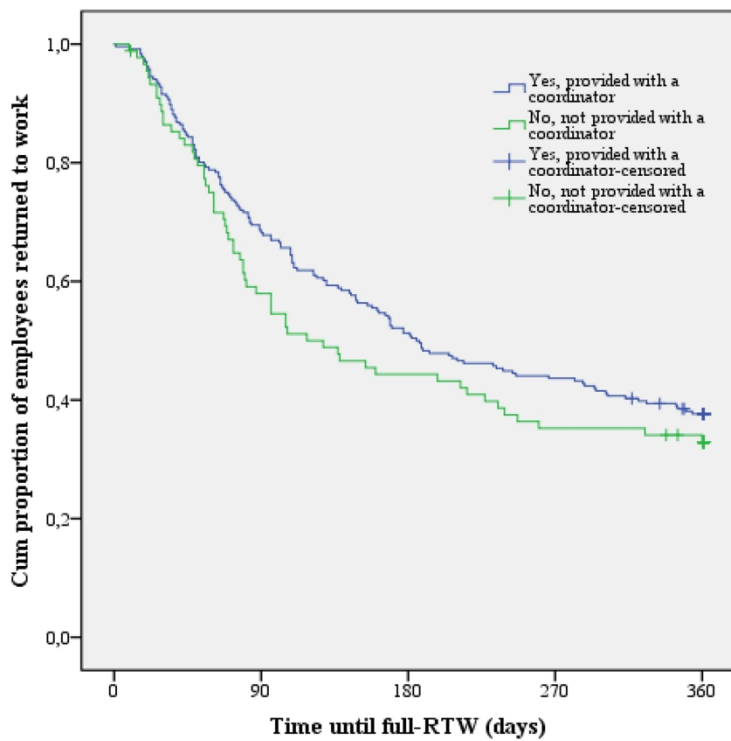

Figure 2: Kaplan-Meier survival plot of time until first full-RTW (days)

291x233mm (300 x 300 DPI)



1  
2  
3  
4  
5  
6  
7  
8  
9  
10  
11  
12  
13  
14  
15  
16  
17  
18  
19  
20  
21  
22  
23  
24  
25  
26  
27  
28  
29  
30  
31  
32  
33  
34  
35  
36  
37  
38  
39  
40  
41  
42  
43  
44  
45  
46  
47  
48  
49  
50  
51  
52  
53  
54  
55  
56  
57  
58  
59  
60

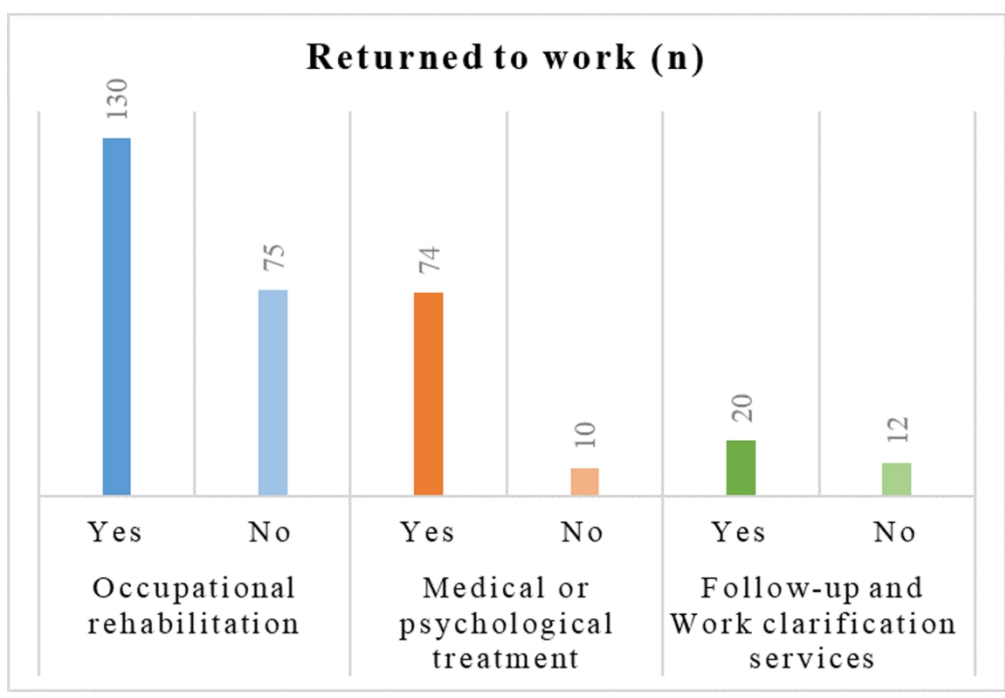

Figure 3: RTW-rates (first-RTW within 360 days yes/no) by type of program  
301x204mm (300 x 300 DPI)

## STROBE Statement—checklist of items that should be included in reports of observational studies

|                              | Item No | Recommendation                                                                                                                                                                                                                                                                                                                                                                                                                                                                                                                                                                                         |
|------------------------------|---------|--------------------------------------------------------------------------------------------------------------------------------------------------------------------------------------------------------------------------------------------------------------------------------------------------------------------------------------------------------------------------------------------------------------------------------------------------------------------------------------------------------------------------------------------------------------------------------------------------------|
| <b>Title and abstract</b>    | 1       | (a) Indicate the study's design with a commonly used term in the title or the abstract<br><i>Page 1</i>                                                                                                                                                                                                                                                                                                                                                                                                                                                                                                |
|                              |         | (b) Provide in the abstract an informative and balanced summary of what was done and what was found<br><i>Page 2</i>                                                                                                                                                                                                                                                                                                                                                                                                                                                                                   |
| <b>Introduction</b>          |         |                                                                                                                                                                                                                                                                                                                                                                                                                                                                                                                                                                                                        |
| Background/rationale         | 2       | Explain the scientific background and rationale for the investigation being reported<br><i>Page 6</i>                                                                                                                                                                                                                                                                                                                                                                                                                                                                                                  |
| Objectives                   | 3       | State specific objectives, including any prespecified hypotheses<br><i>Page 6</i>                                                                                                                                                                                                                                                                                                                                                                                                                                                                                                                      |
| <b>Methods</b>               |         |                                                                                                                                                                                                                                                                                                                                                                                                                                                                                                                                                                                                        |
| Study design                 | 4       | Present key elements of study design early in the paper<br><i>Page 6</i>                                                                                                                                                                                                                                                                                                                                                                                                                                                                                                                               |
| Setting                      | 5       | Describe the setting, locations, and relevant dates, including periods of recruitment, exposure, follow-up, and data collection<br><i>Page 7</i>                                                                                                                                                                                                                                                                                                                                                                                                                                                       |
| Participants                 | 6       | (a) <i>Cohort study</i> —Give the eligibility criteria, and the sources and methods of selection of participants. Describe methods of follow-up<br><i>Page 7-8</i><br><i>Case-control study</i> —Give the eligibility criteria, and the sources and methods of case ascertainment and control selection. Give the rationale for the choice of cases and controls<br><i>Cross-sectional study</i> —Give the eligibility criteria, and the sources and methods of selection of participants                                                                                                              |
|                              |         | (b) <i>Cohort study</i> —For matched studies, give matching criteria and number of exposed and unexposed<br><i>Not matched. Exposed/unexposed page 9-10</i><br><i>Case-control study</i> —For matched studies, give matching criteria and the number of controls per case                                                                                                                                                                                                                                                                                                                              |
| Variables                    | 7       | Clearly define all outcomes, exposures, predictors, potential confounders, and effect modifiers. Give diagnostic criteria, if applicable<br><i>Page 8</i>                                                                                                                                                                                                                                                                                                                                                                                                                                              |
| Data sources/<br>measurement | 8*      | For each variable of interest, give sources of data and details of methods of assessment (measurement). Describe comparability of assessment methods if there is more than one group<br><i>Page 8</i>                                                                                                                                                                                                                                                                                                                                                                                                  |
| Bias                         | 9       | Describe any efforts to address potential sources of bias<br><i>Page 15-16</i>                                                                                                                                                                                                                                                                                                                                                                                                                                                                                                                         |
| Study size                   | 10      | Explain how the study size was arrived at<br><i>Page 8</i>                                                                                                                                                                                                                                                                                                                                                                                                                                                                                                                                             |
| Quantitative variables       | 11      | Explain how quantitative variables were handled in the analyses. If applicable, describe which groupings were chosen and why<br><i>Page 10</i>                                                                                                                                                                                                                                                                                                                                                                                                                                                         |
| Statistical methods          | 12      | (a) Describe all statistical methods, including those used to control for confounding<br><i>Page 10</i><br>(b) Describe any methods used to examine subgroups and interactions<br><i>Page 12</i><br>(c) Explain how missing data were addressed<br><i>Page 8</i><br>(d) <i>Cohort study</i> —If applicable, explain how loss to follow-up was addressed<br><i>Not applicable</i><br><i>Case-control study</i> —If applicable, explain how matching of cases and controls was addressed<br><i>Cross-sectional study</i> —If applicable, describe analytical methods taking account of sampling strategy |
|                              |         | (e) Describe any sensitivity analyses<br><i>Not applicable</i>                                                                                                                                                                                                                                                                                                                                                                                                                                                                                                                                         |

**Results**

|                  |     |                                                                                                                                                                                                                                                                                                                                                                                                                                                                   |
|------------------|-----|-------------------------------------------------------------------------------------------------------------------------------------------------------------------------------------------------------------------------------------------------------------------------------------------------------------------------------------------------------------------------------------------------------------------------------------------------------------------|
| Participants     | 13* | (a) Report numbers of individuals at each stage of study—eg numbers potentially eligible, examined for eligibility, confirmed eligible, included in the study, completing follow-up, and analysed <i>Page 8</i><br>(b) Give reasons for non-participation at each stage <i>Page 8</i><br>(c) Consider use of a flow diagram <i>Not applicable</i>                                                                                                                 |
| Descriptive data | 14* | (a) Give characteristics of study participants (eg demographic, clinical, social) and information on exposures and potential confounders <i>Page 9</i><br>(b) Indicate number of participants with missing data for each variable of interest <i>Page 10</i><br>(c) <i>Cohort study</i> —Summarise follow-up time (eg, average and total amount) <i>Page 8</i>                                                                                                    |
| Outcome data     | 15* | <i>Cohort study</i> —Report numbers of outcome events or summary measures over time <i>Page 11</i><br><i>Case-control study</i> —Report numbers in each exposure category, or summary measures of exposure<br><i>Cross-sectional study</i> —Report numbers of outcome events or summary measures                                                                                                                                                                  |
| Main results     | 16  | (a) Give unadjusted estimates and, if applicable, confounder-adjusted estimates and their precision (eg, 95% confidence interval). Make clear which confounders were adjusted for and why they were included <i>Page 11-12</i><br>(b) Report category boundaries when continuous variables were categorized <i>Page 9</i><br>(c) If relevant, consider translating estimates of relative risk into absolute risk for a meaningful time period <i>Not relevant</i> |
| Other analyses   | 17  | Report other analyses done—eg analyses of subgroups and interactions, and sensitivity analyses <i>Page 12</i>                                                                                                                                                                                                                                                                                                                                                     |

**Discussion**

|                  |    |                                                                                                                                                                                           |
|------------------|----|-------------------------------------------------------------------------------------------------------------------------------------------------------------------------------------------|
| Key results      | 18 | Summarise key results with reference to study objectives <i>Page 12</i>                                                                                                                   |
| Limitations      | 19 | Discuss limitations of the study, taking into account sources of potential bias or imprecision. Discuss both direction and magnitude of any potential bias <i>Page 15-16</i>              |
| Interpretation   | 20 | Give a cautious overall interpretation of results considering objectives, limitations, multiplicity of analyses, results from similar studies, and other relevant evidence <i>Page 17</i> |
| Generalisability | 21 | Discuss the generalisability (external validity) of the study results <i>Page 16</i>                                                                                                      |

**Other information**

|         |    |                                                                                                                                                                              |
|---------|----|------------------------------------------------------------------------------------------------------------------------------------------------------------------------------|
| Funding | 22 | Give the source of funding and the role of the funders for the present study and, if applicable, for the original study on which the present article is based <i>Page 17</i> |
|---------|----|------------------------------------------------------------------------------------------------------------------------------------------------------------------------------|

\*Give information separately for cases and controls in case-control studies and, if applicable, for exposed and unexposed groups in cohort and cross-sectional studies.

**Note:** An Explanation and Elaboration article discusses each checklist item and gives methodological background and published examples of transparent reporting. The STROBE checklist is best used in conjunction with this article (freely available on the Web sites of PLoS Medicine at <http://www.plosmedicine.org/>, Annals of Internal Medicine at <http://www.annals.org/>, and Epidemiology at <http://www.epidem.com/>). Information on the STROBE Initiative is available at [www.strobe-statement.org](http://www.strobe-statement.org).
